# Supplementary material for: Applying the Three Delays Model to understand emergency care seeking and delivery in rural Bangladesh: a qualitative study
Source: PubMed Central journal article supplement — BMJ Open. 2020 Dec 23;10(12):e042690. doi: 10.1136/bmjopen-2020-042690 (PMC7759951; doi:10.1136/bmjopen-2020-042690), 2020-12-23
Supplement: bmjopen-2020-042690.draft_revisions.pdf [file bmjopen-2020-042690.draft_revisions.pdf]

# BMJ Open

BMJ Open is committed to open peer review. As part of this commitment we make the peer review history of every article we publish publicly available.

When an article is published we post the peer reviewers' comments and the authors' responses online. We also post the versions of the paper that were used during peer review. These are the versions that the peer review comments apply to.

The versions of the paper that follow are the versions that were submitted during the peer review process. They are not the versions of record or the final published versions. They should not be cited or distributed as the published version of this manuscript.

BMJ Open is an open access journal and the full, final, typeset and author-corrected version of record of the manuscript is available on our site with no access controls, subscription charges or pay-per-view fees (<http://bmjopen.bmj.com>).

If you have any questions on BMJ Open's open peer review process please email [info.bmjopen@bmj.com](mailto:info.bmjopen@bmj.com)

# BMJ Open

## Applying the Three Delays Model to understand emergency care seeking and delivery in rural Bangladesh: a qualitative study

|                               |                                                                                                                                                                                                                                                                                                                                                                                                                                                                                                                                                                                                                                                                      |
|-------------------------------|----------------------------------------------------------------------------------------------------------------------------------------------------------------------------------------------------------------------------------------------------------------------------------------------------------------------------------------------------------------------------------------------------------------------------------------------------------------------------------------------------------------------------------------------------------------------------------------------------------------------------------------------------------------------|
| Journal:                      | <i>BMJ Open</i>                                                                                                                                                                                                                                                                                                                                                                                                                                                                                                                                                                                                                                                      |
| Manuscript ID                 | bmjopen-2020-042690                                                                                                                                                                                                                                                                                                                                                                                                                                                                                                                                                                                                                                                  |
| Article Type:                 | Original research                                                                                                                                                                                                                                                                                                                                                                                                                                                                                                                                                                                                                                                    |
| Date Submitted by the Author: | 20-Jul-2020                                                                                                                                                                                                                                                                                                                                                                                                                                                                                                                                                                                                                                                          |
| Complete List of Authors:     | Shah, Bansari; Johns Hopkins School of Medicine, Emergency Medicine<br>Krishnan, Nandita; The George Washington University Milken Institute of Public Health, Prevention and Community Health<br>Kodish, Stephen; Pennsylvania State University University Park, Nutritional Sciences<br>Yenokyan, G; Johns Hopkins University Bloomberg School of Public Health, Biostatistics<br>Fatema, Kaniz; Centre for Injury Prevention and Research Bangladesh<br>Burhan Uddin, Kazi; Centre for Injury Prevention and Research Bangladesh<br>Rahman, AKM; Center for Injury Prevention Research, Bangladesh<br>Razzak, Junaid; Johns Hopkins University, Emergency Medicine |
| Keywords:                     | ACCIDENT & EMERGENCY MEDICINE, PUBLIC HEALTH, QUALITATIVE RESEARCH                                                                                                                                                                                                                                                                                                                                                                                                                                                                                                                                                                                                   |
|                               |                                                                                                                                                                                                                                                                                                                                                                                                                                                                                                                                                                                                                                                                      |

SCHOLARONE™  
Manuscripts

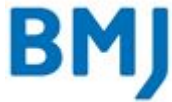

I, the Submitting Author has the right to grant and does grant on behalf of all authors of the Work (as defined in the below author licence), an exclusive licence and/or a non-exclusive licence for contributions from authors who are: i) UK Crown employees; ii) where BMJ has agreed a CC-BY licence shall apply, and/or iii) in accordance with the terms applicable for US Federal Government officers or employees acting as part of their official duties; on a worldwide, perpetual, irrevocable, royalty-free basis to BMJ Publishing Group Ltd ("BMJ") its licensees and where the relevant Journal is co-owned by BMJ to the co-owners of the Journal, to publish the Work in this journal and any other BMJ products and to exploit all rights, as set out in our [licence](#).

The Submitting Author accepts and understands that any supply made under these terms is made by BMJ to the Submitting Author unless you are acting as an employee on behalf of your employer or a postgraduate student of an affiliated institution which is paying any applicable article publishing charge ("APC") for Open Access articles. Where the Submitting Author wishes to make the Work available on an Open Access basis (and intends to pay the relevant APC), the terms of reuse of such Open Access shall be governed by a Creative Commons licence – details of these licences and which [Creative Commons](#) licence will apply to this Work are set out in our licence referred to above.

Other than as permitted in any relevant BMJ Author's Self Archiving Policies, I confirm this Work has not been accepted for publication elsewhere, is not being considered for publication elsewhere and does not duplicate material already published. I confirm all authors consent to publication of this Work and authorise the granting of this licence.

1  
2  
3 **Applying the Three Delays Model to understand emergency care seeking and delivery in**  
4 **rural Bangladesh: a qualitative study**  
5  
6  
7  
8  
9

10 **Authors:** Bansari Shah<sup>1</sup>, Nandita Krishnan<sup>2</sup>, Stephen R. Kodish<sup>3</sup>, Gayane Yenokyan<sup>4</sup>, Kaniz  
11  
12 Fatema<sup>5</sup>, Kazi Burhan Uddin<sup>5</sup>, Fazlur Rahman<sup>5</sup>, Junaid Razzak<sup>1</sup>  
13

14 **Author Affiliations:**

15  
16  
17 <sup>1</sup> Johns Hopkins School of Medicine, Department of Emergency Medicine, Baltimore, Maryland,  
18  
19 USA  
20

21 <sup>2</sup> Milken Institute School of Public Health, The George Washington University, Department of  
22  
23 Prevention and Community Health, Washington, DC, USA  
24

25  
26 <sup>3</sup> Pennsylvania State University, Departments of Biobehavioral Health and Nutritional Sciences  
27  
28 Pennsylvania, USA  
29

30  
31 <sup>4</sup> Johns Hopkins Bloomberg School of Public Health, Department of Biostatistics, Baltimore,  
32  
33 Maryland, USA  
34

35  
36 <sup>5</sup> Center for Injury Prevention and Research, Bangladesh (CIPRB), Dhaka, Bangladesh  
37

38 Corresponding Author:

39  
40 Nandita Krishnan

41  
42 950 New Hampshire Avenue NW  
43

44  
45 Washington, D.C. 20052  
46

47  
48 E-mail: nkrishnan@gwu.edu  
49

50  
51  
52 Word count: 3,595  
53  
54  
55  
56  
57  
58  
59  
60

## ABSTRACT

**Objectives:** The Three Delays Model has been commonly used to understand and prevent maternal mortality but has not been systematically applied to emergency medical conditions more generally. The objective of this study was to apply the Three Delays Model to identify delays in emergency medical care seeking and delivery in rural Bangladesh and factors contributing to these delays.

**Design:** A qualitative approach was used. Data was collected through focus group discussions and in-depth interviews using semi-structured guides. Two analysts jointly developed a codebook iteratively and conducted a thematic analysis to triangulate results.

**Setting:** Six unions in Raiganj sub-district of Bangladesh.

**Participants:** Eight focus group discussions with community members (n=59) and eight in-depth interviews with healthcare providers

**Results:** Delays in the decision to seek care and timely receipt of care upon reaching a health facility were most prominent. The main factors influencing care-seeking decisions included ability to recognize symptoms and decision-making power. Staff and resource shortages and lack of training contributed to delays in receiving care. Delay in reaching care was not perceived as a salient barrier. Both community members and healthcare providers expressed interest in receiving training to improve management of emergency conditions.

**Conclusions:** The Three Delays Model is a practical framework that can be useful for understanding barriers to emergency care and developing more tailored interventions. In rural Bangladesh, training community members and healthcare providers to recognize symptoms and manage acute conditions can reduce delays in care seeking and receiving adequate care at health facilities.

1  
2  
3 **Keywords:** Emergency care, Three Delays Model, Bangladesh, Qualitative research  
4  
5  
6  
7  
8  
9  
10  
11  
12  
13  
14  
15  
16  
17  
18  
19  
20  
21  
22  
23  
24  
25  
26  
27  
28  
29  
30  
31  
32  
33  
34  
35  
36  
37  
38  
39  
40  
41  
42  
43  
44  
45  
46  
47  
48  
49  
50  
51  
52  
53  
54  
55  
56  
57  
58  
59  
60

For peer review only

### Strengths and limitations of this study

- This is one of few studies to apply the Three Delays Framework to the broader context of emergency medical conditions
- Purposive sampling of sub-groups of community members and healthcare providers facilitated data triangulation
- Participants were identified by local community leaders and their views may not be representative of all potential participants
- Due to logistical constraints, data was collected in only six of nine unions, potentially limiting generalizability

## INTRODUCTION

Twenty four million deaths related to emergency medical conditions occur in low and middle-income countries (LMICs) annually, accounting for an estimated 1,023 million disability-adjusted life years (DALYs) and 932 million years of life lost(1). This includes both communicable and non-communicable diseases, with ischemic heart disease and cerebrovascular disease causing the highest mortality burden, and unintentional injuries causing the most DALYs(1). In Bangladesh, stroke and ischemic heart disease are the leading causes of death(2). Additionally, unintentional injuries contribute to a large burden of premature death. For instance, drowning(3) and road traffic injuries(4) result in substantial morbidity and mortality. Road traffic injuries exert a particularly high burden in rural Bangladesh and largely impact individuals between the ages of 25 and 64 years, a highly productive segment of the population(5). This burden could be reduced by improving emergency and acute care seeking and delivery.

Emergency care involves different levels of services, beginning with recognition of symptoms and care provided by laypersons at the scene of the injury or illness episode, and continuing through the care provided in a health facility. The quality and timeliness of care at each level is crucial to survival. The Three Delays Model, originally developed in the context of maternal mortality in low-income settings provides a useful framework to examine factors influencing the timeliness of care(6). According to this model, adverse outcomes from obstetric complications are attributable to three delays between the onset of complications and their ultimate outcome. The first delay is the delay in the decision to seek care, the second delay is related to reaching an appropriate health facility, and the third delay occurs once the patient reaches the health facility and waits to be seen by a medical professional. These delays are in turn influenced by socioeconomic factors, such as wealth and female education, cultural factors



1  
2  
3 such as beliefs and customs, structural factors such as accessibility of care, and health system  
4  
5 level factors such as quality of care.  
6  
7

8  
9 While the literature is consistent on the factors influencing the three delays, the relative  
10 contribution of each of these delays varies across countries. A study in India(7) found that the  
11 first two delays were the main contributors to maternal death, while a study in Malawi(8) found  
12 that the third delay contributed the most to maternal death. Another study applied this model to  
13 understand care seeking and receipt for children with pneumonia in the Peruvian Amazon and  
14 found that the first and third delay were most salient(9). Additionally, differences may exist  
15 across regions within countries. In rural areas, complications are more likely to result in adverse  
16 outcomes than in urban areas as all three delays in care seeking and delivery tend to be present  
17 and exert an interactive effect(7). A study on care seeking for obstetric complications in rural  
18 Bangladesh found that socioeconomic factors such as wealth, women's literacy and women's  
19 employment contributed to the delay in the decision to seek care, while service factors such as  
20 proximity to the health facility and availability of adequate obstetric services at the facility  
21 contributed to all three delays(10).  
22  
23  
24  
25  
26  
27  
28  
29  
30  
31  
32  
33  
34  
35  
36  
37  
38

39 The Three Delays Model has been widely applied to understand maternal mortality but it  
40 has not been systematically applied to the context of emergency medical conditions more  
41 broadly. This model could serve as a useful framework for developing and evaluating  
42 interventions for emergency medical conditions owing to similarities in the factors influencing  
43 care seeking and delivery for obstetric emergencies and other emergency medical conditions(11).  
44 Therefore, the objective of this study was to apply the Three Delays Model to the context of  
45 emergency care seeking and delivery in rural Bangladesh. The aims were: (i) to understand the  
46 contribution of the three delays to emergency care seeking and delivery in rural Bangladesh and  
47  
48  
49  
50  
51  
52  
53  
54  
55  
56  
57  
58  
59  
60

1  
2  
3 identify factors influencing each of the delays, and (ii) to obtain recommendations from  
4 providers and patients to improve emergency care. Findings can inform interventions aimed at  
5 reducing delays in emergency care seeking and delivery and reduce the burden of morbidity and  
6 mortality from these conditions in rural Bangladesh.  
7  
8  
9  
10  
11  
12  
13  
14

## 15 **METHODS**

### 16 **Study Setting**

17  
18 This study was conducted in the Raiganj sub-district of Bangladesh, a predominantly rural area  
19 with a population of about 318,000(12). Raiganj is divided into nine unions. In each union, there  
20 are multiple community health centers (CHCs), which are the community's primary point of  
21 access to formal care. Each union also has one health and family welfare center and child welfare  
22 clinic. For higher levels of care, each sub-district has a health complex. The highest level of care  
23 is the district hospital, which delivers care in major specialty areas (Figure 1).  
24  
25  
26  
27  
28  
29  
30  
31  
32  
33  
34  
35  
36  
37

### 38 **Study Design and Data Collection**

39  
40 An applied qualitative approach was used for this study, which included focus group discussions  
41 (FGDs) with community members and in-depth interviews (IDIs) with healthcare providers. Data  
42 collection took place in June 2016. Semi-structured guides were used for FGDs and IDIs. The  
43 semi-structured format allowed for probing and follow-up questions to gain more clarity from  
44 participants. The interview guides for healthcare providers covered the themes of management of  
45 acute conditions in CHCs, services and resources available to manage these conditions, and  
46 provider perceptions of community members' awareness of where and when to seek care for  
47  
48  
49  
50  
51  
52  
53  
54  
55  
56  
57  
58  
59  
60

1  
2  
3 emergency conditions. The focus group guide explored community members' perceptions of  
4 emergency conditions, how care seeking decisions are made, and access to and availability of  
5 care. FGDs and IDIs were conducted in six of the nine unions. Participants were recruited by  
6 local community leaders. All FGDs and IDIs were conducted by two local public health field  
7 officers from Center of Injury Prevention and Research, Bangladesh (CIPRB). Both officers had  
8 significant field experience doing qualitative data collection and contributed to the developing  
9 the guides.

10  
11  
12 Two FGDs were held with each of the following groups of stakeholders: men, women, the  
13 elderly, and community leaders, for a total of eight FGDs. In order to provide an open  
14 environment where participants felt comfortable sharing their thoughts, the FGDs with each  
15 stakeholder group were held separately. Eight IDIs were conducted with different types of health  
16 care providers: community health care providers (n=4), family welfare visitor (n=1), sub-  
17 assistant community medical officers (n=2) and upazila health and family planning officer (n=1).

18  
19  
20 The FGDs and IDIs were digitally recorded with permission from participants. Field notes were  
21 also taken by the interviewers. All data were collected in Bengali, transcribed verbatim and  
22 translated into English for analysis.

## 23 24 25 **Data Analysis**

26  
27  
28 Transcripts were analyzed with a thematic approach using Dedoose version 7.6.21  
29 (SocioCultural Research Consultants, LLC, Los Angeles, California, USA). Two analysts  
30 independently reviewed the transcripts, discussed broad themes that they identified and  
31 developed an initial codebook. The same analysts independently coded extracts from multiple

1  
2  
3 transcripts using the initial codebook and registered an inter-coder reliability score of 0.75. The  
4  
5 analysts discussed discrepancies in the use of codes to ensure that codes were being applied  
6  
7 uniformly. As additional themes and sub-themes emerged, the analysts modified the codebook.  
8  
9  
10 The same analysts coded all transcripts using the final version of the codebook. Analytic memos  
11  
12 were used to identify recurring patterns and themes in coded text segments.  
13  
14  
15  
16  
17

## 18 **Ethics**

19  
20  
21 All participants provided informed oral consent. Ethical approval for this study was granted by  
22  
23 the Johns Hopkins Medicine Institutional Review Board and the Ethical Review Committee of  
24  
25 the Bangladesh Medical Research Council.  
26  
27  
28  
29  
30

## 31 **Patient and Public Involvement**

32  
33 Patients or the public were not involved in the design, or conduct, or reporting, or dissemination  
34  
35 plans of our research  
36  
37  
38  
39

## 40 **RESULTS**

41  
42 IDIs and FGDs revealed factors across a continuum of care affecting timeliness and quality of  
43  
44 emergency medical services in rural Bangladesh (Figure 2). Salient themes surrounding factors  
45  
46 affecting care are organized and presented according to the Three Delays Model:  
47  
48  
49  
50  
51

### 52 **Delay 1: Delayed decision to seek care**

1  
2  
3 For most community members, a clear hierarchy to care seeking existed. The first line of care  
4 seeking usually consisted of using home remedies or medications and consulting traditional  
5 village doctors or pharmacists at the local neighborhood or “bazaar.” For primary care and what  
6 they perceived as “normal” illnesses, community members reported going to CHCs to seek  
7 treatment. For more serious issues such as pregnancy, care was usually sought at a health  
8 complex, which was perceived to have more staff and services than CHCs. For what they  
9 perceived as emergencies, community members reported seeking care at private clinics or  
10 hospitals, where they noted, “doctors are available all the time.”  
11  
12  
13  
14  
15  
16  
17  
18  
19  
20

21  
22 *Q: If any one of you or your family members get sick where do you go first?*  
23

24  
25 *R: At first, we go to the community clinic, then local pharmacy and if it is getting*  
26 *serious than go to the upazila health complex or district hospital. But upazila*  
27 *health complex doesn't give good service so most of the time we go to the private*  
28 *clinic.*  
29  
30  
31  
32  
33

34  
35 – Male community member  
36  
37

38 In addition to perceived severity of illness, proximity, cost and past experiences at health  
39 facilities were important factors that determined care seeking decisions.  
40  
41

42  
43 Community members perceived symptoms such as high fever, cold, abdominal pain or fainting  
44 to be indicative of “major problems”. They perceived a range of conditions to constitute  
45 emergencies, ranging from cuts, burns and poisoning, to drowning, accidents, stroke and heart  
46 attacks.  
47  
48  
49  
50  
51

1  
2  
3 The majority of participants reported that the decision to seek care was made by the head of the  
4 household, who was typically the husband. In some cases, family elders such as mothers-in law  
5 made care seeking decisions.  
6  
7  
8  
9

10 *In our village we are very close to each other, we ask [advice from] one another*  
11 *and then take a decision where to go; mainly the family head takes the final*  
12 *decision.*  
13  
14  
15  
16  
17

18 - Male community member  
19  
20

21 Decision making around care seeking was found not to be an individual choice, but a  
22 household-level decision based on perceived seriousness of illness, competing demands, and  
23 available household resources for transit and care.  
24  
25  
26  
27  
28  
29  
30

### 31 **Delay 2: Delayed arrival at health facility**

32  
33

34 When decisions to seek care were made, participants reported that CHCs were largely accessible  
35 for most community members. A few participants reported that delays in transportation made it  
36 difficult to quickly reach higher-level health facilities in the event of an emergency condition,  
37 but most participants said that transportation was not an issue and several modes, such as  
38 rickshaws and vans were available. Distances to hospitals varied depending on the union. In  
39 some unions, hospitals were between 3-5 kilometers away from the village and took  
40 approximately 15-20 minutes to reach, but in some unions, the nearest hospital was 10-20  
41 kilometers away and took more than an hour to reach.  
42  
43  
44  
45  
46  
47  
48  
49  
50  
51  
52  
53  
54  
55  
56  
57  
58  
59  
60

1  
2  
3 *If any accidental patient is very serious then they directly go to the hospital,*  
4  
5 *because they know we can't handle that.*  
6  
7

8 – Healthcare provider  
9

10  
11 Community members mostly rely on arranging their own transportation to health facilities.  
12

13  
14 According to CHC providers, patients had good knowledge and awareness of where to seek care  
15  
16 but for some patients, distance and cost could be barriers in this setting.  
17  
18

### 21 22 **Delay 3: Delayed provision of adequate care** 23

24  
25 CHCs represent the first point of entry in to the formal healthcare system. However, CHC  
26  
27 providers explained that they were only able to provide basic first aid for injuries and accidents.  
28

29  
30 In case of more complex conditions, they referred patients to the nearest hospital or health  
31  
32 complex as they either lacked the training, equipment or manpower to manage emergency  
33  
34 conditions.  
35

36  
37 *Mainly we give first aid treatment and health education for diarrhea, fever, cold*  
38  
39 *etc. If any patient came with a serious problem then we referred them to the*  
40  
41 *health complex for better treatment.*  
42  
43

44 – Healthcare Provider  
45  
46

47  
48 CHCs varied in terms of number of staff members available during working hours, ranging from  
49  
50 one to four individuals. CHCs had a mix of office-level and field-level staff and specialized  
51  
52 providers such as gynecologists were not commonly reported. CHCs reported carrying medicines  
53  
54 and supplies for basic first aid, family planning, pregnancy-related supplementation and common  
55  
56  
57  
58  
59

1  
2  
3 illnesses such as fever. However, stock outs were common and community members indicated  
4  
5 that people got medicines “depending on availability.”  
6  
7

8  
9 Most CHCs were equipped with basic equipment such as blood pressure machines and  
10  
11 glucometers, with some exceptions. While more sophisticated medical equipment such as  
12  
13 nebulizers and x-ray machines were available in the upazila health complex, lack of training and  
14  
15 infrastructure were barriers to their utilization within clinics.  
16

17  
18 *“We have an operation room but it’s not used, we need a surgeon and anesthetist*  
19  
20 *for that. We have x-ray machine but it is not working.”*  
21  
22

23  
24 - Healthcare provider  
25

26  
27 Clinic staff reported that CHCs were open six days a week, for approximately six hours each  
28  
29 day. However, according to community members, CHCs are open only for four to five days a  
30  
31 week, for about three to four hours each day. A community elder remarked: *“if we go to the*  
32  
33 *clinic after 1 pm, they say it’s closed.”* In contrast, the hospitals were open 24 hours, seven days  
34  
35 a week, but hospitals are farther away from CHCs for most people in need of urgent care.  
36

37  
38 Upon reaching hospitals, some participants felt that patients were prioritized based on  
39  
40 connections they had with doctors or ability to pay, which resulted in delays in being seen by a  
41  
42 healthcare provider and receiving treatment.  
43  
44  
45  
46  
47  
48

## 49 **Recommendations to improve emergency care**

50

### 51 *Providers*

52  
53  
54  
55  
56  
57  
58  
59  
60



1  
2  
3 Providers expressed a need for and interest in receiving more training to handle acute conditions.  
4  
5 They felt that this could help prevent deaths and save time and money for patients. Providers also  
6  
7 felt that patients did not have confidence in their abilities and skills. Providers wanted to learn  
8  
9 more about management of emergency conditions.  
10  
11

12  
13 *[We need] gauze, bandage and suturing materials but we have very limited*  
14  
15 *knowledge on suturing and other subjects. If we get some training on it, then we*  
16  
17 *can provide a better service*  
18

19  
20  
21 – Healthcare provider 1  
22

23  
24 *“Emergency management of acute care, acute MI (myocardial infarction), near*  
25  
26 *drowning, shock – this type of management training we need the most. Sometimes*  
27  
28 *we refer patient for treatment but patient dies on the road. If we can manage it*  
29  
30 *here, the life can be saved.”*  
31

32  
33 - Healthcare provider 2  
34  
35

36 Providers also recommended that the supply of medicines to the CHCs be improved, particularly  
37  
38 for antibiotics, which were often in low supply and expensive for patients to purchase. Other  
39  
40 needs expressed by providers were having more trained staff in CHCs, particularly trained  
41  
42 doctors, surgeons and assistants and better infrastructure.  
43  
44  
45

#### 46 47 48 49 *Community members* 50

51  
52 Community members felt that providers at CHCs were insufficiently trained and could only  
53  
54 provide basic primary care. They also felt that providers were not good at diagnosing illnesses  
55  
56  
57  
58  
59

1  
2  
3 and could only treat “common” diseases such as fever and cold. Another concern was that many  
4  
5 providers were more invested in their own private practices and therefore did not offer adequate  
6  
7 care to patients at the CHC. Community members suggested enforcing better regulations over  
8  
9 doctors with private practices as well as eliminating favoritism towards patients.  
10  
11

12  
13 Community members noted cyclical shortages of medicines at the CHCs and felt that better  
14  
15 monitoring of supply by authorities could address these shortages. They were also concerned that  
16  
17 providers at CHCs were prescribing unnecessary medications based on what was available rather  
18  
19 than what was required.  
20  
21

22  
23 Like providers, community members felt that more trained staff and equipment was needed at  
24  
25 CHCs.  
26  
27

28 *“Because the CHCP (community health care provider) is a man, so he did not*  
29 *checkup the women. It’s a problem. If a female doctor or CHCP was available*  
30 *here, it will be very helpful. Some don’t want to go to the hospital and they don’t*  
31 *go for checkup.”*  
32  
33  
34  
35  
36  
37

38 - Female community member  
39  
40

41 Community members were enthusiastic about receiving training to provide first aid and manage  
42  
43 acute conditions. A few women mentioned that they already received training as caregivers,  
44  
45 known as Anchal Mas, to deliver basic first aid.  
46  
47  
48  
49

50 *If any children cut his or her hand or leg came to me, I have first aid training*  
51 *from CIPRB. I was an Anchal Ma. I have cotton gaze and medicine, so they came*  
52 *to me. At first, I clean the wound, then put the bandage*  
53  
54  
55  
56  
57  
58  
59  
60

– Female community member

## DISCUSSION

In rural Bangladesh, delays in the decision to seek care and receiving care at the health facility were barriers to timely management of emergency conditions, whereas delays in reaching health facilities were less of a primary concern due to a tiered health system with multiple levels of care available to most of the population.

Factors contributing to care seeking decisions included proximity to health facility, cost of care, and past experiences receiving care. Also in this context, cultural factors underpin health-related decisions, such as the persistently strong role of traditional medicine as well as the weak decision-making power, particularly for younger women. In this setting, successful interventions to improve emergency care seeking may need to target key decision makers, such as traditional healers, male heads of household, or family elders. For instance, in Mozambique, traditional healers were utilized as part of successful intervention to increase referral rates to health facilities(13).

Another important factor contributing to delayed decisions to seek care was the ability of community members to recognize signs and symptoms of acute conditions. Although community members differentiated between ‘normal’ and ‘emergency’ conditions, basing care seeking decisions on the severity of symptoms is limited by individual capacity to understand what is biomedically urgent. Prior research has shown that the inability to recognize symptoms is a barrier to timely care seeking(7). An important component of a community-based program might include education sessions focused on screening and identifying signs and symptoms of life threatening versus less serious conditions.

1  
2  
3 Delayed provision of care occurs once the patient reaches the health facility and waits to  
4 be seen by a medical professional. Staffing and resource shortages often hinder the delivery of  
5 timely and high quality medical care in settings where less than optimal investment in social  
6 services results in overwhelmed systems. We found that community members felt that healthcare  
7 providers in CHCs lacked sufficient training to provide high quality acute care, thus contributing  
8 to delayed decisions to seek care in the future in a negative feedback loop. When individuals  
9 sought emergency care at CHCs, they were usually referred to the health complex or hospitals as  
10 CHCs lacked the resources and capacity to treat these conditions. This resulted in delays that  
11 could be avoided if CHCs received adequate resources and providers are trained in management  
12 of emergency conditions. Building capacity of CHC providers in the management of emergency  
13 conditions can reduce the need for referrals. Even if referrals are required, better management of  
14 emergency conditions at the CHC level can stabilize the patient's condition, improving the  
15 likelihood of a favorable outcome once the patient reaches the tertiary healthcare facility. We did  
16 find a high level of interest among healthcare providers to receive additional training in  
17 emergency care. Therefore, it may be possible to adapt successful emergency care training  
18 programs from other similar countries to this setting. Compared to other LMICs where health  
19 worker attrition is high(14), rural Bangladesh has a community health worker (CHW) cadre  
20 which is prioritized and enjoys relatively good job security; therefore, investments in CHW  
21 training may see long-term improvements in health through better care practices and improved  
22 patient satisfaction. Improved monitoring and accountability systems are also needed to ensure  
23 that CHCs adequately serve patients.

24  
25  
26  
27  
28  
29  
30  
31  
32  
33  
34  
35  
36  
37  
38  
39  
40  
41  
42  
43  
44  
45  
46  
47  
48  
49  
50  
51  
52  
53  
54  
55  
56  
57  
58  
59  
60  
Other research suggests that the community's delay in mobilizing can be considered a  
fourth delay that hinders timely management of emergency conditions(15). In the case of

1  
2  
3 emergency conditions such as drowning or road traffic injuries, even if the decision to seek care  
4  
5 is made quickly, the delay in mobilizing care from first responders at the scene of the illness  
6  
7 episode can determine the outcome of the injury. Bystander education and awareness has been  
8  
9 identified as an important factor influencing this delay and a qualitative study on trauma delays  
10  
11 for road traffic injury patients in Brazil found that bystander capacity to provide care was  
12  
13 low(16). Simple interventions at the community level may be highly effective to mobilize first  
14  
15 responders in low-resource settings. For example, interventions have included training  
16  
17 commercial drivers in providing first aid(17) and training laypeople to be first responders(18). In  
18  
19 our study, community members were interested in receiving training in first aid and some had  
20  
21 already received prior training. Community-based programs have enjoyed much success in  
22  
23 Bangladesh across a range of health conditions(19). Bangladesh started community-based  
24  
25 programs to address drowning and these programs have shown an average DALY cost aversion  
26  
27 of \$362(20). Approaches from these programs can be adapted to develop community-based  
28  
29 education and training for the management of emergency conditions. In rural Bangladesh,  
30  
31 community mobilization strategies that involve multiple approaches combining education and  
32  
33 training, as well as enhanced community infrastructure may create enabling environments for  
34  
35 improved outcomes from emergency medical conditions.  
36  
37  
38  
39  
40  
41  
42

### 43 **Limitations**

44  
45  
46 Due to road access and weather limitations, data were only collected from six of the nine unions  
47  
48 in Raiganj. Additionally, participants were identified by local community leaders and their views  
49  
50 may not be representative of all community members; however, those individuals were sampled  
51  
52 based on specific criteria we deemed important for answering the research questions and  
53  
54 purposive sampling is a strength of this type of research.  
55  
56  
57  
58  
59  
60

1  
2  
3 This study did have several strengths. First, by eliciting the voices of community members and  
4 healthcare providers, unique insights were gained that allowed for comparisons between the local  
5 and biomedical communities. Second, by including sub-groups of community members (e.g.  
6 men, women, elders, and community leaders) and as well as sub-groups of healthcare providers  
7 (e.g. doctors, nurses, community health workers), participant triangulation was achieved.  
8  
9  
10  
11  
12  
13  
14  
15  
16  
17

## 18 **Conclusions**

19  
20 In rural Bangladesh, the health system has a far reach through a multi-tiered network of  
21 providers. However, delays in deciding to seek care and delays in receiving care at the health  
22 facility contribute to adverse outcomes from emergency medical conditions. While better  
23 infrastructure and resources are necessary, improvements in emergency care delivery in this  
24 setting may be achieved through modest, yet targeted behavior change interventions, such as  
25 training of community members and healthcare providers.  
26  
27  
28  
29  
30  
31  
32  
33  
34  
35  
36  
37

## 38 **CONTRIBUTORSHIP STATEMENT**

39  
40 BS conceived the study; BS designed the study protocol; NK and SK carried out the analysis and  
41 interpretation of these data. BS, NK and SK drafted the manuscript; GY, KF, KBU, FR and JR  
42 critically revised the manuscript for intellectual content. All authors read and approved the final  
43 manuscript.  
44  
45  
46  
47  
48  
49  
50

## 51 **ACKNOWLEDGMENTS**

52  
53  
54 None  
55  
56  
57  
58  
59  
60

## FUNDING

This work was supported by the Paul S. Lietman Global Travel Grant from the Johns Hopkins Center for Global Health.

## COMPETING INTERESTS

None declared

## ETHICAL APPROVAL

Ethical approval for this study was granted by the Johns Hopkins Medicine Institutional Review Board and the Ethical Review Committee of the Bangladesh Medical Research Council.

## DATA AVAILABILITY STATEMENT

De-identified transcripts can be requested by emailing the lead author, Bansari Shah (bansarishahmd@gmail.com)

## REFERENCES

- (1) Hsia RY, Thind A, Zakariah A, Hicks ER, Mock C. Prehospital and Emergency Care: Updates from the Disease Control Priorities, Version 3. *World J Surg* 2015 Sep;39(9):2161-2167.
- (2) Institute for Health Metrics and Evaluation (IHME) [Internet]. Bangladesh profile. Seattle, WA: IHME, University of Washington, 2018; [cited 2020 May 5]. Available from <http://www.healthdata.org/bangladesh>
- (3) Rahman A, Alonge O, Bhuiyan AA, Agrawal P, Salam SS, Talab A, et al. Epidemiology of Drowning in Bangladesh: An Update. *Int J Environ Res Public Health* 2017 May 5;14(5):10.3390/ijerph14050488.

- 1  
2  
3 (4) Global status report on road safety 2018 [Internet]. Geneva: World Health Organization;  
4 2018. Licence: CC BYNC-SA 3.0 IGO; [cited 2020 May 5]. Available from  
5 <https://www.who.int/publications-detail/global-status-report-on-road-safety-2018>  
6  
7  
8 (5) Ul Baset MK, Rahman A, Alonge O, Agrawal P, Wadhvaniya S, Rahman F. Pattern of Road  
9 Traffic Injuries in Rural Bangladesh: Burden Estimates and Risk Factors. *Int J Environ Res*  
10 *Public Health* 2017 Nov 7;14(11):10.3390/ijerph14111354.  
11  
12 (6) Thaddeus S, Maine D. Too far to walk: maternal mortality in context. *Soc Sci Med* 1994  
13 Apr;38(8):1091-1110.  
14  
15  
16 (7) Sk MIK, Paswan B, Anand A, Mondal NA. Praying until death: revisiting three delays model  
17 to contextualize the socio-cultural factors associated with maternal deaths in a region with high  
18 prevalence of eclampsia in India. *BMC Pregnancy Childbirth* 2019 Aug 28;19(1):314-019-2458-  
19 5.  
20  
21 (8) Mgawadere F, Unkels R, Kazembe A, van den Broek N. Factors associated with maternal  
22 mortality in Malawi: application of the three delays model. *BMC Pregnancy Childbirth* 2017 Jul  
23 12;17(1):219-017-1406-5.  
24  
25  
26 (9) Pajuelo MJ, Anticona Huaynate C, Correa M, Mayta Malpartida H, Ramal Asayag C,  
27 Seminario JR, et al. Delays in seeking and receiving health care services for pneumonia in  
28 children under five in the Peruvian Amazon: a mixed-methods study on caregivers' perceptions.  
29 *BMC Health Serv Res* 2018 Mar 1;18(1):149-018-2950-z.  
30  
31  
32 (10) Sikder SS, Labrique AB, Craig IM, Wakil MA, Shamim AA, Ali H, et al. Patterns and  
33 determinants of care seeking for obstetric complications in rural northwest Bangladesh: analysis  
34 from a prospective cohort study. *BMC Health Serv Res* 2015 Apr 18;15:166-015-0832-1.  
35  
36  
37 (11) Calvillo EJ, Skog AP, Tenner AG, Wallis LA. Applying the lessons of maternal mortality  
38 reduction to global emergency health. *Bull World Health Organ* 2015 Jun 1;93(6):417-423.  
39  
40 (12) Bangladesh Bureau of Statistics [Internet]; [cited 2020 May 5]. Available from  
41 <http://www.citypopulation.de/php/bangladesh-admin.php?adm2id=8861>  
42  
43 (13) Audet CM, Salato J, Blevins M, Amsalem D, Vermund SH, Gaspar F. Educational  
44 intervention increased referrals to allopathic care by traditional healers in three high HIV-  
45 prevalence rural districts in Mozambique. *PLoS One* 2013 Aug 1;8(8):e70326.  
46  
47  
48 (14) Willis-Shattuck M, Bidwell P, Thomas S, Wyness L, Blaauw D, Ditlopo P. Motivation and  
49 retention of health workers in developing countries: a systematic review. *BMC Health Serv Res*  
50 2008 Dec 4;8:247-6963-8-247.  
51  
52 (15) MacDonald T, Jackson S, Charles MC, Periel M, Jean-Baptiste MV, Salomon A, et al. The  
53 fourth delay and community-driven solutions to reduce maternal mortality in rural Haiti: a  
54  
55  
56  
57  
58  
59



1  
2  
3 community-based action research study. *BMC Pregnancy Childbirth* 2018 Jun 20;18(1):254-018-  
4 1881-3.  
5

6  
7 (16) Patel A, Vissoci JRN, Hocker M, Molina E, Gil NM, Staton C. Qualitative evaluation of  
8 trauma delays in road traffic injury patients in Maringa, Brazil. *BMC Health Serv Res* 2017 Dec  
9 2;17(1):804-017-2762-6.  
10

11 (17) Mock CN, Tiska M, Adu-Ampofo M, Boakye G. Improvements in prehospital trauma care  
12 in an African country with no formal emergency medical services. *J Trauma* 2002 Jul;53(1):90-  
13 97.  
14

15  
16 (18) Husum H, Gilbert M, Wisborg T. Training pre-hospital trauma care in low-income  
17 countries: the 'Village University' experience. *Med Teach* 2003 Mar;25(2):142-148.  
18

19 (19) El Arifeen S, Christou A, Reichenbach L, Osman FA, Azad K, Islam KS, et al. Community-  
20 based approaches and partnerships: innovations in health-service delivery in Bangladesh. *Lancet*  
21 2013 Dec 14;382(9909):2012-2026.  
22

23  
24 (20) Rahman F, Bose S, Linnan M, Rahman A, Mashreky S, Haaland B, et al. Cost-effectiveness  
25 of an injury and drowning prevention program in Bangladesh. *Pediatrics* 2012  
26 Dec;130(6):e1621-8.  
27  
28  
29  
30  
31  
32  
33  
34  
35  
36  
37  
38  
39  
40  
41  
42  
43  
44  
45  
46  
47  
48  
49  
50  
51  
52  
53  
54  
55  
56  
57  
58  
59  
60

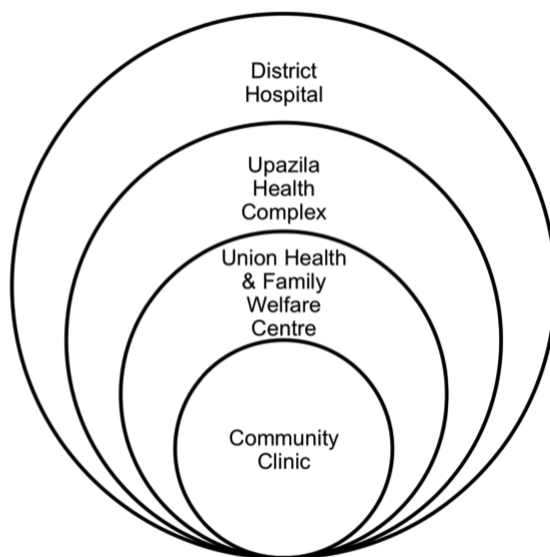

Structure of the public health system in Bangladesh

352x264mm (72 x 72 DPI)

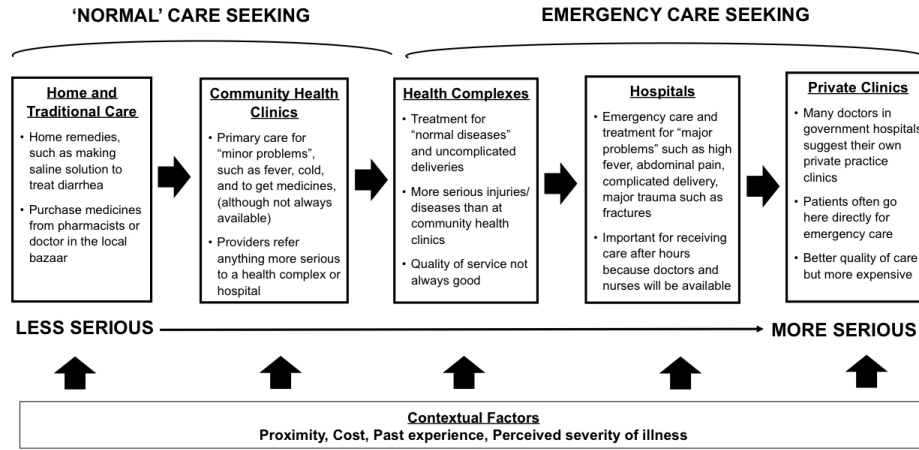

Continuum of care-seeking behavior as explained by community members in rural Bangladesh

470x264mm (72 x 72 DPI)

|                    | Topic                                        | Item                                                                                                                                                                                                                                                                                                                                             | Page number                                                                                                                                    |
|--------------------|----------------------------------------------|--------------------------------------------------------------------------------------------------------------------------------------------------------------------------------------------------------------------------------------------------------------------------------------------------------------------------------------------------|------------------------------------------------------------------------------------------------------------------------------------------------|
| Title and abstract |                                              |                                                                                                                                                                                                                                                                                                                                                  |                                                                                                                                                |
| 1                  | Title                                        | Concise description of the nature and topic of the study<br>Identifying the study as qualitative or indicating the approach (e.g., ethnography, grounded theory) or data collection methods (e.g., interview, focus group) is recommended                                                                                                        | X                                                                                                                                              |
| 2                  | Abstract                                     | Summary of key elements of the study using the abstract format of the intended publication; typically includes background, purpose, methods, results, and conclusions                                                                                                                                                                            | X                                                                                                                                              |
| Introduction       |                                              |                                                                                                                                                                                                                                                                                                                                                  |                                                                                                                                                |
| 3                  | Problem formulation                          | Description and significance of the problem/phenomenon studied; review of relevant theory and empirical work; problem statement                                                                                                                                                                                                                  | Introduction<br>Significance: paragraph 1<br>Review of empirical work: Paragraph 3<br>Problem statement: 1 <sup>st</sup> sentence, paragraph 4 |
| 4                  | Purpose of research question                 | Purpose of the study and specific objectives or questions                                                                                                                                                                                                                                                                                        | Introduction: end of final paragraph                                                                                                           |
| Methods            |                                              |                                                                                                                                                                                                                                                                                                                                                  |                                                                                                                                                |
| 5                  | Qualitative approach and research paradigm   | Qualitative approach (e.g., ethnography, grounded theory, case study, phenomenology, narrative research) and guiding theory if appropriate; identifying the research paradigm (e.g., postpositivist, constructivist/interpretivist) is also recommended; rationale                                                                               | Methods<br>Study design and data collection: applied approach                                                                                  |
| 6                  | Researcher characteristics and reflexivity   | Researchers' characteristics that may influence the research, including personal attributes, qualifications/experience, relationship with participants, assumptions, and/or presuppositions; potential or actual interaction between researchers' characteristics and the research questions, approach, methods, results, and/or transferability | Methods<br>Study design and data collection paragraphs 1 and 2                                                                                 |
| 7                  | Context                                      | Setting/site and salient contextual factors; rationale                                                                                                                                                                                                                                                                                           |                                                                                                                                                |
| 8                  | Sampling strategy                            | How and why research participants, documents, or events were selected; criteria for deciding when no further sampling was necessary (e.g., sampling saturation); rationale                                                                                                                                                                       | Methods<br>Study setting                                                                                                                       |
| 9                  | Ethical issues pertaining to human subjects  | Documentation of approval by an appropriate ethics review board and participant consent, or explanation for lack thereof; other confidentiality and data security issues                                                                                                                                                                         | Methods<br>Ethics                                                                                                                              |
| 10                 | Data collection methods                      | Types of data collected; details of data collection procedures including (as appropriate) start and stop dates of data collection and analysis, iterative process, triangulation of sources/methods, and modification of procedures in response to evolving study findings; rationale                                                            | Methods<br>Study design and data collection                                                                                                    |
| 11                 | Data collection instruments and technologies | Description of instruments (e.g., interview guides, questionnaires) and devices (e.g., audio recorders) used for data collection; if/how the instrument(s) changed over the course of the study                                                                                                                                                  | Methods<br>Study design and data collection                                                                                                    |

|                  |                                                                                              |                                                                                                                                                                                                                                                                                                       |                                                               |
|------------------|----------------------------------------------------------------------------------------------|-------------------------------------------------------------------------------------------------------------------------------------------------------------------------------------------------------------------------------------------------------------------------------------------------------|---------------------------------------------------------------|
| 12               | Units of study                                                                               | Number and relevant characteristics of participants, documents, or events included in the study; level of participation (could be reported in results)                                                                                                                                                | Methods<br>Study design and data collection: paragraph 2      |
| 13               | Data processing                                                                              | Methods for processing data prior to and during analysis, including transcription, data entry, data management and security, verification of data integrity, data coding, and anonymization/de-identification of excerpts                                                                             | Methods<br>Study design and data collection: paragraph 3      |
| 14               | Data analysis                                                                                | Process by which inferences, themes, etc., were identified and developed, including the researchers involved in data analysis; usually references a specific paradigm or approach; rationale                                                                                                          | Methods<br>Data Analysis                                      |
| 15               | Techniques to enhance trustworthiness                                                        | Techniques to enhance trustworthiness and credibility of data analysis (e.g., member checking, audit trail, triangulation); rationale                                                                                                                                                                 | Methods<br>Data Analysis: use of 2 coders to develop codebook |
| Results/findings |                                                                                              |                                                                                                                                                                                                                                                                                                       |                                                               |
| 16               | Synthesis and interpretation                                                                 | Main findings (e.g., interpretations, inferences, and themes); might include development of a theory or model, or integration with prior research or theory                                                                                                                                           | Results: organized and presented using the Three Delays Model |
| 17               | Links to empirical data                                                                      | Evidence (e.g., quotes, field notes, text excerpts, photographs) to substantiate analytic findings                                                                                                                                                                                                    | Results: Quotes provided under each salient theme             |
| Discussion       |                                                                                              |                                                                                                                                                                                                                                                                                                       |                                                               |
| 18               | Integration with prior work, implications, transferability, and contribution(s) to the field | Short summary of main findings; explanation of how findings and conclusions connect to, support, elaborate on, or challenge conclusions of earlier scholarship; discussion of scope of application/generalizability; identification of unique contribution(s) to scholarship in a discipline or field | Discussion: paragraphs 1-5                                    |
| 19               | Limitations                                                                                  | Trustworthiness and limitations of findings                                                                                                                                                                                                                                                           | Discussion: limitations                                       |
| Other            |                                                                                              |                                                                                                                                                                                                                                                                                                       |                                                               |
| 20               | Conflicts of interest                                                                        | Potential sources of influence or perceived influence on study conduct and conclusions; how these were managed                                                                                                                                                                                        | No competing interests declared                               |
| 21               | Funding                                                                                      | Sources of funding and other support; role of funders in data collection, interpretation, and reporting                                                                                                                                                                                               | Funding statement                                             |

# BMJ Open

## Applying the Three Delays Model to understand emergency care seeking and delivery in rural Bangladesh: a qualitative study

|                                 |                                                                                                                                                                                                                                                                                                                                                                                                                                                                                                                                                                                                                                                                      |
|---------------------------------|----------------------------------------------------------------------------------------------------------------------------------------------------------------------------------------------------------------------------------------------------------------------------------------------------------------------------------------------------------------------------------------------------------------------------------------------------------------------------------------------------------------------------------------------------------------------------------------------------------------------------------------------------------------------|
| Journal:                        | <i>BMJ Open</i>                                                                                                                                                                                                                                                                                                                                                                                                                                                                                                                                                                                                                                                      |
| Manuscript ID                   | bmjopen-2020-042690.R1                                                                                                                                                                                                                                                                                                                                                                                                                                                                                                                                                                                                                                               |
| Article Type:                   | Original research                                                                                                                                                                                                                                                                                                                                                                                                                                                                                                                                                                                                                                                    |
| Date Submitted by the Author:   | 08-Sep-2020                                                                                                                                                                                                                                                                                                                                                                                                                                                                                                                                                                                                                                                          |
| Complete List of Authors:       | Shah, Bansari; Johns Hopkins School of Medicine, Emergency Medicine<br>Krishnan, Nandita; The George Washington University Milken Institute of Public Health, Prevention and Community Health<br>Kodish, Stephen; Pennsylvania State University University Park, Nutritional Sciences<br>Yenokyan, G; Johns Hopkins University Bloomberg School of Public Health, Biostatistics<br>Fatema, Kaniz; Centre for Injury Prevention and Research Bangladesh<br>Burhan Uddin, Kazi; Centre for Injury Prevention and Research Bangladesh<br>Rahman, AKM; Center for Injury Prevention Research, Bangladesh<br>Razzak, Junaid; Johns Hopkins University, Emergency Medicine |
| <b>Primary Subject Heading</b>: | Emergency medicine                                                                                                                                                                                                                                                                                                                                                                                                                                                                                                                                                                                                                                                   |
| Secondary Subject Heading:      | Public health, Qualitative research                                                                                                                                                                                                                                                                                                                                                                                                                                                                                                                                                                                                                                  |
| Keywords:                       | ACCIDENT & EMERGENCY MEDICINE, PUBLIC HEALTH, QUALITATIVE RESEARCH                                                                                                                                                                                                                                                                                                                                                                                                                                                                                                                                                                                                   |
|                                 |                                                                                                                                                                                                                                                                                                                                                                                                                                                                                                                                                                                                                                                                      |

SCHOLARONE™  
Manuscripts



I, the Submitting Author has the right to grant and does grant on behalf of all authors of the Work (as defined in the below author licence), an exclusive licence and/or a non-exclusive licence for contributions from authors who are: i) UK Crown employees; ii) where BMJ has agreed a CC-BY licence shall apply, and/or iii) in accordance with the terms applicable for US Federal Government officers or employees acting as part of their official duties; on a worldwide, perpetual, irrevocable, royalty-free basis to BMJ Publishing Group Ltd ("BMJ") its licensees and where the relevant Journal is co-owned by BMJ to the co-owners of the Journal, to publish the Work in this journal and any other BMJ products and to exploit all rights, as set out in our [licence](#).

The Submitting Author accepts and understands that any supply made under these terms is made by BMJ to the Submitting Author unless you are acting as an employee on behalf of your employer or a postgraduate student of an affiliated institution which is paying any applicable article publishing charge ("APC") for Open Access articles. Where the Submitting Author wishes to make the Work available on an Open Access basis (and intends to pay the relevant APC), the terms of reuse of such Open Access shall be governed by a Creative Commons licence – details of these licences and which [Creative Commons](#) licence will apply to this Work are set out in our licence referred to above.

Other than as permitted in any relevant BMJ Author's Self Archiving Policies, I confirm this Work has not been accepted for publication elsewhere, is not being considered for publication elsewhere and does not duplicate material already published. I confirm all authors consent to publication of this Work and authorise the granting of this licence.

1  
2  
3 **Applying the Three Delays Model to understand emergency care seeking and delivery in**  
4 **rural Bangladesh: a qualitative study**  
5  
6  
7  
8  
9

10 **Authors:** Bansari Shah<sup>1</sup>, Nandita Krishnan<sup>2</sup>, Stephen R. Kodish<sup>3</sup>, Gayane Yenokyan<sup>4</sup>, Kaniz  
11  
12 Fatema<sup>5</sup>, Kazi Burhan Uddin<sup>5</sup>, Fazlur Rahman<sup>5</sup>, Junaid Razzak<sup>1</sup>  
13

14 **Author Affiliations:**

15  
16  
17 <sup>1</sup> Johns Hopkins School of Medicine, Department of Emergency Medicine, Baltimore, Maryland,  
18  
19 USA  
20

21 <sup>2</sup> Milken Institute School of Public Health, The George Washington University, Department of  
22  
23 Prevention and Community Health, Washington, DC, USA  
24

25  
26 <sup>3</sup> Pennsylvania State University, Departments of Biobehavioral Health and Nutritional Sciences  
27  
28 Pennsylvania, USA  
29

30  
31 <sup>4</sup> Johns Hopkins Bloomberg School of Public Health, Department of Biostatistics, Baltimore,  
32  
33 Maryland, USA  
34

35  
36 <sup>5</sup> Center for Injury Prevention and Research, Bangladesh (CIPRB), Dhaka, Bangladesh  
37

38 Corresponding Author:

39  
40 Nandita Krishnan

41  
42 950 New Hampshire Avenue NW  
43

44  
45 Washington, D.C. 20052  
46

47  
48 E-mail: nkrishnan@gwu.edu  
49

50  
51  
52 Word count: 4,096  
53  
54  
55  
56  
57  
58  
59  
60



## ABSTRACT

**Objectives:** The Three Delays Model has been commonly used to understand and prevent maternal mortality but has not been systematically applied to emergency medical conditions more generally. The objective of this study was to identify delays in emergency medical care seeking and delivery in rural Bangladesh and factors contributing to these delays by using the Three Delays Model as a framework.

**Design:** A qualitative approach was used. Data was collected through focus group discussions and in-depth interviews using semi-structured guides. Two analysts jointly developed a codebook iteratively and conducted a thematic analysis to triangulate results.

**Setting:** Six unions in Raiganj sub-district of Bangladesh.

**Participants:** Eight focus group discussions with community members (n=59) and eight in-depth interviews with healthcare providers

**Results:** Delays in the decision to seek care and timely receipt of care upon reaching a health facility were most prominent. The main factors influencing care-seeking decisions included ability to recognize symptoms and decision-making power. Staff and resource shortages and lack of training contributed to delays in receiving care. Delay in reaching care was not perceived as a salient barrier. Both community members and healthcare providers expressed interest in receiving training to improve management of emergency conditions.

**Conclusions:** The Three Delays Model is a practical framework that can be useful for understanding barriers to emergency care and developing more tailored interventions. In rural Bangladesh, training community members and healthcare providers to recognize symptoms and manage acute conditions can reduce delays in care seeking and receiving adequate care at health facilities.

1  
2  
3 **Keywords:** Emergency care, Three Delays Model, Bangladesh, Qualitative research  
4  
5  
6  
7  
8  
9  
10  
11  
12  
13  
14  
15  
16  
17  
18  
19  
20  
21  
22  
23  
24  
25  
26  
27  
28  
29  
30  
31  
32  
33  
34  
35  
36  
37  
38  
39  
40  
41  
42  
43  
44  
45  
46  
47  
48  
49  
50  
51  
52  
53  
54  
55  
56  
57  
58  
59  
60

For peer review only

### Strengths and limitations of this study

- This is one of few studies to apply the Three Delays Framework to the broader context of emergency medical conditions
- Purposive sampling of sub-groups of community members and healthcare providers facilitated data triangulation
- Participants were identified by local community leaders and their views may not be representative of all potential participants
- Due to logistical constraints, data was collected in only six of nine unions, potentially limiting generalizability

## INTRODUCTION

Twenty four million deaths related to emergency medical conditions occur in low and middle-income countries (LMICs) annually, accounting for an estimated 1,023 million disability-adjusted life years (DALYs) and 932 million years of life lost(1). This includes both communicable and non-communicable diseases, with ischemic heart disease and cerebrovascular disease causing the highest mortality burden, and unintentional injuries causing the most DALYs(1). In Bangladesh, stroke and ischemic heart disease are the leading causes of death(2). Additionally, unintentional injuries contribute to a large burden of premature death. For instance, drowning(3) and road traffic injuries(4) result in substantial morbidity and mortality. Road traffic injuries exert a particularly high burden in rural Bangladesh and largely impact individuals between the ages of 25 and 64 years, a highly productive segment of the population(5). This burden could be reduced by improving emergency and acute care seeking and delivery.

Emergency care involves different levels of services, beginning with recognition of symptoms and care provided by laypersons at the scene of the injury or illness episode, and continuing through the care provided in a health facility. The quality and timeliness of care at each level is crucial to survival. The Three Delays Model, originally developed in the context of maternal mortality in low-income settings provides a useful framework to examine factors influencing the timeliness of care(6). According to this model, adverse outcomes from obstetric complications are attributable to three delays between the onset of complications and their ultimate outcome. The first delay is the delay in the decision to seek care, the second delay is related to reaching an appropriate health facility, and the third delay occurs once the patient reaches the health facility and waits to be seen by a medical professional. These delays are in turn influenced by socioeconomic factors, such as wealth and female education, cultural factors

1  
2  
3 such as beliefs and customs, structural factors such as accessibility of care, and health system  
4  
5 level factors such as quality of care.  
6  
7

8  
9 While the literature is consistent on the factors influencing the three delays, the relative  
10 contribution of each of these delays varies across countries. A study in India(7) found that the  
11 first two delays were the main contributors to maternal death, while a study in Malawi(8) found  
12 that the third delay contributed the most to maternal death. Another study applied this model to  
13 understand care seeking and receipt for children with pneumonia in the Peruvian Amazon and  
14 found that the first and third delay were most salient(9). Additionally, differences may exist  
15 across regions within countries. In rural areas, complications are more likely to result in adverse  
16 outcomes than in urban areas as all three delays in care seeking and delivery tend to be present  
17 and exert an interactive effect(7). A study on care seeking for obstetric complications in rural  
18 Bangladesh found that socioeconomic factors such as wealth, women's literacy and women's  
19 employment contributed to the delay in the decision to seek care, while service factors such as  
20 proximity to the health facility and availability of adequate obstetric services at the facility  
21 contributed to all three delays(10).  
22  
23  
24  
25  
26  
27  
28  
29  
30  
31  
32  
33  
34  
35  
36  
37  
38

39 The Three Delays Model has been widely applied to understand maternal mortality but it  
40 has not been systematically applied to the context of emergency medical conditions more  
41 broadly. This model could serve as a useful framework for developing and evaluating  
42 interventions for emergency medical conditions owing to similarities in the factors influencing  
43 care seeking and delivery for obstetric emergencies and other emergency medical conditions(11).  
44 Therefore, the aims of this study were: (i) to understand the contribution of the three delays to  
45 emergency care seeking and delivery in rural Bangladesh and identify factors influencing each of  
46 the delays, and (ii) to obtain recommendations from providers and patients to improve  
47  
48  
49  
50  
51  
52  
53  
54  
55  
56  
57  
58  
59  
60

1  
2  
3 emergency care. Findings can inform interventions aimed at reducing delays in emergency care  
4 seeking and delivery and reduce the burden of morbidity and mortality from these conditions in  
5 rural Bangladesh.  
6  
7  
8  
9

## 10 11 12 13 **METHODS**

### 14 15 **Study Setting**

16  
17  
18 This study was conducted in the Raiganj sub-district of Bangladesh, a predominantly rural area  
19 with a population of about 318,000(12). Raiganj is divided into nine unions. In each union, there  
20 are multiple community health centers (CHCs), which are the community's primary point of  
21 access to formal care. Each union also has one health and family welfare center and child welfare  
22 clinic. For higher levels of care, each sub-district has a health complex. The highest level of care  
23 is the district hospital, which delivers care in major specialty areas (Figure 1).  
24  
25  
26  
27  
28  
29  
30  
31  
32  
33  
34  
35

### 36 37 **Study Design and Data Collection**

38  
39 An applied qualitative approach was used for this study, which included focus group discussions  
40 (FGDs) with community members and in-depth interviews (IDIs) with healthcare providers. Data  
41 collection took place in June 2016. Semi-structured guides were used for FGDs and IDIs  
42 (Supplementary File). The semi-structured format allowed for probing and follow-up questions  
43 to gain more clarity from participants. The interview guides for healthcare providers covered the  
44 themes of management of acute conditions in CHCs, services and resources available to manage  
45 these conditions, and provider perceptions of community members' awareness of where and  
46 when to seek care for emergency conditions. The focus group guide explored community  
47  
48  
49  
50  
51  
52  
53  
54  
55  
56  
57  
58  
59  
60

1  
2  
3 members' perceptions of emergency conditions, how care seeking decisions are made, and  
4  
5 access to and availability of care. The guides were developed with the help of Center of Injury  
6  
7 Prevention and Research, Bangladesh (CIPRB) researchers using the rapid appraisal approach  
8  
9 for community health assessments. The guides were developed in English, translated into  
10  
11 Bengali and then back translated.  
12  
13

14  
15 FGDs and IDIs were conducted in six of the nine unions. A purposive sampling strategy was  
16  
17 used to elicit perspectives from different groups of community members and different types of  
18  
19 healthcare providers. Two FGDs were held with each of the following groups of stakeholders:  
20  
21 men, women, the elderly, and community leaders, for a total of eight FGDs (n=59). In order to  
22  
23 provide an open environment where participants felt comfortable sharing their thoughts, the  
24  
25 FGDs with each stakeholder group were held separately. Eight IDIs were conducted with  
26  
27 different types of health care providers: community health center providers (n=4), family welfare  
28  
29 visitor (n=1), sub-assistant community medical officers (n=2) and upazila health and family  
30  
31 planning officer (n=1).  
32  
33  
34  
35

36  
37 Community members were recruited by local community leaders. They were chosen based on  
38  
39 their involvement in community affairs, availability, and willingness to speak openly. Healthcare  
40  
41 providers were recruited by CIPRB researchers. As there are limited healthcare providers in each  
42  
43 community, we approached all of those who were available and willing to speak to us. All  
44  
45 participants were over the age of 18. All FGDs and IDIs were conducted by two local public  
46  
47 health field officers from CIPRB (KF and KBU). Both officers had significant field experience  
48  
49 doing qualitative data collection and contributed to developing the guides. The FGDs and IDIs  
50  
51 were digitally recorded with permission from participants. Field notes were also taken by the  
52  
53  
54  
55  
56  
57  
58  
59  
60

1  
2  
3 interviewers. All data were collected in Bengali, transcribed verbatim and translated into English  
4  
5 for analysis. On average, each interview/focus group lasted 30 minutes.  
6  
7  
8  
9

## 10 11 **Data Analysis**

12  
13  
14 Transcripts were analyzed with a thematic approach using Dedoose version 7.6.21  
15  
16 (SocioCultural Research Consultants, LLC, Los Angeles, California, USA). The analysis  
17  
18 combined an inductive and deductive approach. Two analysts (NK and SK) independently  
19  
20 reviewed the transcripts and jointly developed a codebook, which consisted of some pre-defined  
21  
22 themes as well as additional themes that emerged from the data. The same analysts  
23  
24 independently coded extracts from multiple transcripts using the initial codebook and registered  
25  
26 an inter-coder reliability score of 0.75. The analysts discussed discrepancies in the use of codes  
27  
28 to ensure that codes were being applied uniformly. As additional themes and sub-themes  
29  
30 emerged, the analysts modified the codebook. The same analysts coded all transcripts using the  
31  
32 final version of the codebook. Analytic memos were used to identify recurring patterns and  
33  
34 themes in coded text segments.  
35  
36  
37  
38  
39  
40  
41  
42

## 43 **Ethics**

44  
45  
46 All participants provided informed oral consent. Ethical approval for this study was granted by  
47  
48 the Johns Hopkins Medicine Institutional Review Board and the Ethical Review Committee of  
49  
50 the Bangladesh Medical Research Council.  
51  
52  
53  
54  
55  
56  
57  
58  
59  
60



### **Patient and Public Involvement**

Patients or the public were not involved in the design, or conduct, or reporting, or dissemination plans of our research

## **RESULTS**

IDIs and FGDs revealed factors across a continuum of care affecting timeliness and quality of emergency medical services in rural Bangladesh . Salient themes surrounding factors affecting care are organized and presented according to the Three Delays Model:

### **Delay 1: Delayed decision to seek care**

The decision to seek care was influenced by several socio-contextual factors, most notably perceived severity of illness. Community members perceived symptoms such as high fever, cold, abdominal pain or fainting to be indicative of “major problems”. They perceived a range of conditions to constitute emergencies, ranging from cuts, burns and poisoning, to drowning, accidents, stroke and heart attacks.

Greater distances from health facilities, high cost and negative past experiences at health facilities contributed to delays in deciding to seek care. However, perceived severity of illness superseded these other factors. If the illness was perceived to be very severe, participants reported that care was sought immediately regardless of these other factors as this focus group exchange with female community members illustrated:

1  
2  
3 *Participant 5: During my pregnancy, at the time of delivery my water was broken*  
4 *but there was no pain, so we were waiting the whole night and went to the*  
5 *Shirajgonj hospital at the morning.*

6  
7  
8  
9  
10  
11 *Moderator: Your water broke but you wait for morning, why not go to the*  
12 *hospital that time?*

13  
14  
15  
16 *Participant 5: Because the time was midnight, so we wait for morning.*

17  
18  
19 *Moderator: If these types of emergency arise do you go as soon as possible or*  
20 *wait for some time?*

21  
22  
23  
24 *Participant 3: No, no. When her mother-in-law became sick, they took her*  
25 *immediately.*

26  
27  
28  
29 Additionally, cultural factors including female decision-making power and role of traditional  
30 medicine influenced care seeking decisions. The majority of participants reported that the  
31 decision to seek care was made by the head of the household, who was typically the husband. In  
32 some cases, family elders such as mothers-in law made care seeking decisions.

33  
34  
35  
36  
37  
38  
39 *In our village we are very close to each other, we ask [advice from] one another*  
40 *and then take a decision where to go; mainly the family head takes the final*  
41 *decision.*

42  
43  
44  
45  
46  
47 - Male community member

48  
49  
50 Based on these factors, for most community members, a clear hierarchy to care seeking existed  
51 (Figure 2). The first line of care seeking, particularly for women, usually consisted of using  
52 home remedies or medications and consulting traditional village doctors or pharmacists at the  
53

1  
2  
3 local neighborhood or “bazaar.” For primary care and what they perceived as “normal” illnesses,  
4  
5 community members reported going to CHCs to seek treatment. For more serious issues such as  
6  
7 pregnancy, care was usually sought at a health complex, which was perceived to have more staff  
8  
9 and services than CHCs. For what they perceived as emergencies, community members reported  
10  
11 seeking care at private clinics or hospitals, where they noted, “doctors are available all the time.”  
12  
13

14  
15 *Q: If any one of you or your family members get sick where do you go first?*

16  
17  
18 *R: At first, we go to the community clinic, then local pharmacy and if it is getting*  
19  
20 *serious than go to the upazila health complex or district hospital. But upazila*  
21  
22 *health complex doesn't give good service so most of the time we go to the private*  
23  
24 *clinic.*  
25  
26

27  
28 – Male community member  
29  
30  
31  
32  
33

### 34 **Delay 2: Delayed arrival at health facility**

35  
36  
37 When decisions to seek care were made, participants reported that CHCs were largely accessible  
38  
39 for most community members. A few participants reported that delays in transportation made it  
40  
41 difficult to quickly reach higher-level health facilities in the event of an emergency condition,  
42  
43 but most participants said that transportation was not an issue and several modes, such as  
44  
45 rickshaws and vans were available. Distances to hospitals varied depending on the union. In  
46  
47 some unions, hospitals were between 3-5 kilometers away from the village and took  
48  
49 approximately 15-20 minutes to reach, but in some unions, the nearest hospital was 10-20  
50  
51 kilometers away and took more than an hour to reach.  
52  
53  
54  
55  
56  
57  
58  
59  
60

1  
2  
3 Community members mostly rely on arranging their own transportation to health facilities.  
4  
5 According to CHC providers, patients had good knowledge and awareness of where to seek care  
6  
7 but for some patients, distance and cost could be barriers in this setting.  
8  
9

10  
11 *If any accident patient is very serious then they directly go to the hospital,*  
12  
13 *because they know we can't handle that.*  
14

15  
16 – Upazila health and family planning officer  
17  
18  
19  
20  
21  
22  
23  
24

### 25 **Delay 3: Delayed provision of adequate care**

26  
27  
28 CHCs represent the first point of entry in to the formal healthcare system. However, lack of  
29  
30 adequate training of providers and shortage of resources and staff contributed to delays in  
31  
32 patients receiving care at these facilities. CHC providers explained that they were only able to  
33  
34 provide basic first aid for injuries and accidents. In case of more complex conditions, they  
35  
36 referred patients to the nearest hospital or health complex to manage emergency conditions.  
37  
38

39  
40 *Mainly we give first aid treatment and health education for diarrhea, fever, cold*  
41  
42 *etc. If any patient came with a serious problem then we referred them to the*  
43  
44 *health complex for better treatment.*  
45  
46

47 – Community health center provider  
48  
49

50  
51 CHCs reported carrying medicines and supplies for basic first aid, family planning, pregnancy-  
52  
53 related supplementation and common illnesses such as fever. However, stock outs were common  
54  
55 and community members indicated that people got medicines “depending on availability.”  
56  
57  
58  
59

1  
2  
3 Most CHCs were equipped with basic equipment such as blood pressure machines and  
4  
5 glucometers, with some exceptions. While more sophisticated medical equipment such as  
6  
7 nebulizers and x-ray machines were available in the upazila health complex, lack of training and  
8  
9 infrastructure were barriers to their utilization within clinics.  
10  
11

12  
13 *“We have an operation room but it’s not used, we need a surgeon and anesthetist*  
14  
15 *for that. We have x-ray machine but it is not working.”*  
16  
17

18 - Upazila health and family planning officer  
19  
20

21 CHCs varied in terms of number of staff members available during working hours, ranging from  
22  
23 one to four individuals. CHCs had a mix of office-level and field-level staff and specialized  
24  
25 providers such as gynecologists were not commonly reported. Clinic staff reported that CHCs  
26  
27 were open six days a week, for approximately six hours each day. However, according to  
28  
29 community members, CHCs are open only for four to five days a week, for about three to four  
30  
31 hours each day. A community elder remarked: *“if we go to the clinic after 1 pm, they say it’s*  
32  
33 *closed.”* In contrast, the hospitals were open 24 hours, seven days a week, but hospitals are  
34  
35 farther away from CHCs for most people in need of urgent care.  
36  
37  
38  
39

40 Additionally, some community members felt that upon reaching hospitals, patients were  
41  
42 prioritized based on connections they had with doctors or ability to pay, which resulted in delays  
43  
44 in being seen by a healthcare provider and receiving treatment. Community members also felt  
45  
46 that shortage of resources such as medications contributed to delays in receiving timely care once  
47  
48 they reached the health facility:  
49  
50  
51  
52  
53  
54  
55  
56  
57  
58  
59  
60

1  
2  
3 *“Raigonj hospital has no medicine and Jia medical also has very limited*  
4 *medicine. Last week I go to Jia medical college hospital to visit a patient and it*  
5 *was a very helpless situation.*

6  
7  
8  
9  
10  
11 - Community elder  
12  
13  
14  
15

## 16 **Recommendations to improve emergency care**

### 17 *Providers*

18  
19  
20 Providers expressed a need for and interest in receiving more training to handle acute conditions.  
21  
22 They felt that this could help prevent deaths and save time and money for patients. Providers also  
23  
24 felt that patients did not have confidence in their abilities and skills. Providers wanted to learn  
25  
26 more about management of emergency conditions.  
27  
28  
29  
30

31  
32 *[We need] gauze, bandage and suturing materials but we have very limited*  
33 *knowledge on suturing and other subjects. If we get some training on it, then we*  
34 *can provide a better service*

35  
36  
37  
38  
39  
40 – Community health center provider  
41  
42

43 *“Emergency management of acute care, acute MI (myocardial infarction), near*  
44 *drowning, shock – this type of management training we need the most. Sometimes*  
45 *we refer patient for treatment but patient dies on the road. If we can manage it*  
46 *here, the life can be saved.”*

47  
48  
49  
50  
51  
52 - Upazila health and family planning officer  
53  
54  
55  
56  
57  
58  
59  
60

1  
2  
3 Providers also recommended that the supply of medicines to the CHCs be improved, particularly  
4 for antibiotics, which were often in low supply and expensive for patients to purchase. Other  
5 needs expressed by providers were having more trained staff in CHCs, particularly trained  
6 doctors, surgeons and assistants and better infrastructure.  
7  
8  
9  
10  
11  
12  
13  
14  
15

### 16 *Community members*

17  
18 Community members felt that providers at CHCs were insufficiently trained and could only  
19 provide basic primary care. They also felt that providers were not good at diagnosing illnesses  
20 and could only treat “common” diseases such as fever and cold. Another concern was that many  
21 providers were more invested in their own private practices and therefore did not offer adequate  
22 care to patients at the CHC. Community members suggested enforcing better regulations over  
23 doctors with private practices as well as eliminating favoritism towards patients.  
24  
25  
26  
27  
28  
29  
30  
31  
32

33 Community members noted cyclical shortages of medicines at the CHCs and felt that better  
34 monitoring of supply by authorities could address these shortages. They were also concerned that  
35 providers at CHCs were prescribing unnecessary medications based on what was available rather  
36 than what was required.  
37  
38  
39  
40  
41  
42

43 Like providers, community members felt that more trained staff and equipment was needed at  
44 CHCs.  
45  
46

47  
48 *“We need a full time doctor here for any emergency. In case of any emergency*  
49 *like heart disease, he/she can manage it immediately.”*  
50  
51  
52  
53

54 - Female community member  
55  
56  
57  
58  
59  
60

1  
2  
3 Community members were enthusiastic about receiving training to provide first aid and manage  
4 acute conditions. A few women mentioned that they already received training as caregivers,  
5  
6 known as Anchal Mas, to deliver basic first aid.  
7  
8  
9  
10

11  
12 *If any children cut his or her hand or leg came to me, I have first aid training*  
13 *from CIPRB. I was an Anchal Ma. I have cotton gaze and medicine, so they came*  
14 *to me. At first, I clean the wound, then put the bandage*  
15  
16  
17  
18

19  
20 – Female community member  
21  
22  
23  
24

## 25 **DISCUSSION**

26  
27 In rural Bangladesh, we found that several socio-contextual factors influenced care  
28 seeking decisions, which could contribute to delays in the decision to seek care. Delays in  
29 receiving care at the health facility were also a barrier to timely management of emergency  
30 conditions, whereas delays in reaching health facilities were less of a primary concern due to a  
31 tiered health system with multiple levels of care available to most of the population.  
32  
33  
34  
35  
36  
37  
38

39 Factors contributing to care seeking decisions included perceived severity of illness,  
40 proximity to and timings of health facilities, cost of care, and past experiences receiving care.  
41 Among these, perceived illness severity appeared to be the strongest factor influencing decision-  
42 making. Determining severity of an illness episode depends on the ability of community  
43 members to recognize signs and symptoms of acute conditions. Although community members  
44 differentiated between ‘normal’ and ‘emergency’ conditions, basing care seeking decisions on  
45 the severity of symptoms is limited by individual capacity to understand what is biomedically  
46 urgent. Moreover, seemingly mild or non-specific symptoms, such as nausea could be indicative  
47  
48  
49  
50  
51  
52  
53  
54  
55  
56  
57  
58  
59  
60



1  
2  
3 of serious conditions such as myocardial infarctions(13). Prior research has shown that the  
4 inability to recognize symptoms is a barrier to timely care seeking(7) and that awareness of  
5 symptoms for emergency conditions such as heart attacks and stroke is low (14,15). Therefore,  
6 an important component of a community-based program might include education sessions  
7 focused on screening and identifying signs and symptoms of life threatening versus less serious  
8 conditions.

9  
10  
11  
12  
13  
14  
15  
16  
17 We also found that in this context, cultural factors such as the strong role of traditional  
18 medicine as well as the weak decision-making power, particularly for younger women underpin  
19 health-related decisions. Of all the demographic groups, women were more likely to report first  
20 seeking care from the village doctor. This could stem from gender norms in Bangladesh, which  
21 dictate that women should remain at home and should be accompanied by men in public spaces  
22 (16). As village doctors are located closer to home, it may be easier and more acceptable for  
23 women to go to the “bazaar” unaccompanied. In this setting, successful interventions to improve  
24 emergency care seeking may need to target key decision makers, such as traditional healers, male  
25 heads of household, or family elders. For instance, in Mozambique, traditional healers were  
26 utilized as part of successful intervention to increase referral rates to health facilities(17).

27  
28  
29  
30  
31  
32  
33  
34  
35  
36  
37  
38  
39  
40  
41 Delayed provision of care occurs once the patient reaches the health facility and waits to  
42 be seen by a medical professional. Staffing and resource shortages often hindered the delivery of  
43 timely and high quality medical care. We also found that community members felt that  
44 healthcare providers in CHCs lacked sufficient training to provide high quality acute care, a view  
45 that was echoed by healthcare providers themselves. When individuals sought emergency care at  
46 CHCs, they were usually referred to the health complex or hospitals as CHCs lacked the  
47 resources and capacity to treat these conditions. This resulted in delays that could be avoided if

1  
2  
3 CHCs received adequate resources and providers are trained in management of emergency  
4 conditions. Building capacity of CHC providers in the management of emergency conditions can  
5 reduce the need for referrals. Even if referrals are required, better management of emergency  
6 conditions at the CHC level can stabilize the patient's condition, improving the likelihood of a  
7 favorable outcome once the patient reaches the tertiary healthcare facility. We did find a high  
8 level of interest among healthcare providers to receive additional training in emergency care.  
9 Therefore, it may be possible to adapt successful emergency care training programs from other  
10 similar countries to this setting. Compared to other LMICs where health worker attrition is  
11 high(18), rural Bangladesh has a community health worker (CHW) cadre which is prioritized and  
12 enjoys relatively good job security; therefore, investments in CHW training may see long-term  
13 improvements in health through better care practices and improved patient satisfaction. Improved  
14 monitoring and accountability systems are also needed to ensure that CHCs adequately serve  
15 patients.

16  
17  
18  
19  
20  
21  
22  
23  
24  
25  
26  
27  
28  
29  
30  
31  
32  
33  
34  
35  
36  
37  
38  
39  
40  
41  
42  
43  
44  
45  
46  
47  
48  
49  
50  
51  
52  
53  
54  
55  
56  
57  
58  
59  
60  
Other research suggests that the community's delay in mobilizing can be considered a  
fourth delay that hinders timely management of emergency conditions(19). In the case of  
emergency conditions such as drowning or road traffic injuries, even if the decision to seek care  
is made quickly, the delay in mobilizing care from first responders at the scene of the illness  
episode can determine the outcome of the injury. Bystander education and awareness has been  
identified as an important factor influencing this delay and a qualitative study on trauma delays  
for road traffic injury patients in Brazil found that bystander capacity to provide care was  
low(20). Simple interventions at the community level may be highly effective to mobilize first  
responders in low-resource settings. For example, interventions have included training  
commercial drivers in providing first aid(21) and training laypeople to be first responders(22). In

1  
2  
3 our study, community members were interested in receiving training in first aid and some had  
4 already received prior training. Community-based programs have enjoyed much success in  
5 Bangladesh across a range of health conditions(23). Bangladesh started community-based  
6 programs to address drowning and these programs have shown an average DALY cost aversion  
7 of \$362(24). Approaches from these programs can be adapted to develop community-based  
8 education and training for the management of emergency conditions. In rural Bangladesh,  
9 community mobilization strategies that involve multiple approaches combining education and  
10 training, as well as enhanced community infrastructure may create enabling environments for  
11 improved outcomes from emergency medical conditions.  
12  
13  
14  
15  
16  
17  
18  
19  
20  
21  
22  
23

### 24 **Limitations**

25  
26  
27 Due to road access and weather limitations, data were only collected from six of the nine unions  
28 in Raiganj. Additionally, participants were identified by local community leaders and their views  
29 may not be representative of all community members; however, those individuals were sampled  
30 based on specific criteria we deemed important for answering the research questions and  
31 purposive sampling is a strength of this type of research.  
32  
33  
34  
35  
36  
37  
38  
39

40 This study did have several strengths. First, by eliciting the voices of community members and  
41 healthcare providers, unique insights were gained that allowed for comparisons between the local  
42 and biomedical communities. Second, by including sub-groups of community members (e.g.  
43 men, women, elders, and community leaders) and as well as sub-groups of healthcare providers  
44 (e.g. doctors, nurses, community health workers), participant triangulation was achieved.  
45  
46  
47  
48  
49  
50  
51  
52  
53

### 54 **Conclusions**

1  
2  
3 In rural Bangladesh, the health system has a far reach through a multi-tiered network of  
4 providers. However, several socio-contextual factors influence care seeking decisions and could  
5 contribute to delays in deciding to seek care, while lack of adequate training, and manpower and  
6 resource shortages resulted in delays in receiving care at the health facility. Both these factors  
7 could contribute to adverse outcomes from emergency medical conditions. While better  
8 infrastructure and resources are necessary, improvements in emergency care delivery in this  
9 setting may be achieved through modest, yet targeted behavior change interventions, such as  
10 training of community members and healthcare providers.  
11  
12  
13  
14  
15  
16  
17  
18  
19  
20  
21  
22  
23

#### 24 **CONTRIBUTORSHIP STATEMENT**

25  
26 BS conceived the study; BS designed the study protocol; NK and SK carried out the analysis and  
27 interpretation of these data. BS, NK and SK drafted the manuscript; GY, KF, KBU, FR and JR  
28 critically revised the manuscript for intellectual content. All authors read and approved the final  
29 manuscript.  
30  
31  
32  
33  
34  
35  
36  
37

#### 38 **ACKNOWLEDGMENTS**

39  
40 None  
41  
42  
43  
44

#### 45 **FUNDING**

46  
47 This work was supported by the Paul S. Lietman Global Travel Grant from the Johns Hopkins  
48 Center for Global Health.  
49  
50  
51  
52  
53

#### 54 **COMPETING INTERESTS**

1  
2  
3 None declared  
4  
5  
6  
7

## 8 **ETHICAL APPROVAL**

9  
10 Ethical approval for this study was granted by the Johns Hopkins Medicine Institutional Review  
11 Board and the Ethical Review Committee of the Bangladesh Medical Research Council.  
12  
13  
14

## 15 **DATA AVAILABILITY STATEMENT**

16  
17 De-identified transcripts can be requested by emailing the lead author, Bansari Shah  
18  
19 (bansarishahmd@gmail.com)  
20  
21  
22  
23

## 24 **REFERENCES**

- 25  
26  
27  
28 (1) Hsia RY, Thind A, Zakariah A, et al. Prehospital and Emergency Care: Updates from the  
29 Disease Control Priorities, Version 3. *World J Surg* 2015;39(9):2161-7. doi:10.1007/s00268-  
30 015-2997-5.  
31  
32  
33 (2) Institute for Health Metrics and Evaluation (IHME). **Bangladesh profile**. Seattle, WA:  
34 IHME, University of Washington, 2018. Available: <http://www.healthdata.org/bangladesh>  
35  
36  
37 (3) Rahman A, Alonge O, Bhuiyan AA, et al. Epidemiology of Drowning in Bangladesh: An  
38 Update. *Int J Environ Res Public Health* 2017;14(5):488. doi:[10.3390/ijerph14050488](https://doi.org/10.3390/ijerph14050488)  
39  
40 (4) Global status report on road safety 2018. Geneva: World Health Organization; 2018. Licence:  
41 CC BYNC- SA 3.0 IGO. Available:  
42 [https://www.who.int/violence\\_injury\\_prevention/road\\_safety\\_status/2018/en/](https://www.who.int/violence_injury_prevention/road_safety_status/2018/en/)  
43  
44 (5) Ul Baset MK, Rahman A, Alonge O, et al. Pattern of Road Traffic Injuries in Rural  
45 Bangladesh: Burden Estimates and Risk Factors. *Int J Environ Res Public Health*  
46 2017;14(11):1354. doi:10.3390/ijerph14111354.  
47  
48 (6) Thaddeus S, Maine D. Too far to walk: maternal mortality in context. *Soc Sci Med*  
49 1994;38(8):1091-110.  
50  
51 (7) Sk MIK, Paswan B, Anand A, et al. Praying until death: revisiting three delays model to  
52 contextualize the socio-cultural factors associated with maternal deaths in a region with high  
53  
54  
55  
56  
57  
58  
59  
60

1  
2  
3 prevalence of eclampsia in India. *BMC Pregnancy Childbirth* 2019;19(1):314. doi:  
4 10.1186/s12884-019-2458-5.  
5

6  
7 (8) Mgawadere F, Unkels R, Kazembe A, et al. Factors associated with maternal mortality in  
8 Malawi: application of the three delays model. *BMC Pregnancy Childbirth* 2017;17(1):219. doi:  
9 10.1186/s12884-017-1406-5.  
10

11 (9) Pajuelo MJ, Anticona Huaynate C, Correa M, et al. Delays in seeking and receiving health  
12 care services for pneumonia in children under five in the Peruvian Amazon: a mixed-methods  
13 study on caregivers' perceptions. *BMC Health Serv Res* 2018;18(1):149. doi: 10.1186/s12913-  
14 018-2950-z.  
15

16  
17 (10) Sikder SS, Labrique AB, Craig IM, et al. Patterns and determinants of care seeking for  
18 obstetric complications in rural northwest Bangladesh: analysis from a prospective cohort study.  
19 *BMC Health Serv Res* 2015;15:166. doi: [10.1186/s12913-015-0832-1](https://doi.org/10.1186/s12913-015-0832-1)  
20

21 (11) Calvello EJ, Skog AP, Tenner AG, et al. Applying the lessons of maternal mortality  
22 reduction to global emergency health. *Bull World Health Organ* 2015;93(6):417-23.  
23 doi: [10.2471/BLT.14.146571](https://doi.org/10.2471/BLT.14.146571)  
24

25  
26 (12) Bangladesh Bureau of Statistics. Available: [http://www.citypopulation.de/php/bangladesh-  
27 admin.php?adm2id=8861](http://www.citypopulation.de/php/bangladesh-admin.php?adm2id=8861)  
28

29 (13) Lu L, Liu M, Sun R, et al. Myocardial Infarction: Symptoms and Treatments. *Cell Biochem*  
30 *Biophys* 2015;72(3):865-7. doi: 10.1007/s12013-015-0553-4.  
31

32  
33 (14) Aminde LN, Takah N, Ngwasiri C, et al. Population awareness of cardiovascular disease  
34 and its risk factors in Buea, Cameroon. *BMC Public Health* 2017;17(1):545. doi:  
35 10.1186/s12889-017-4477-3.  
36

37 (15) Hertz JT, Madut DB, Tesha RA, et al. Knowledge of myocardial infarction symptoms and  
38 perceptions of self-risk in Tanzania. *Am Heart J* 2019;210:69-74. doi: 10.1016/j.ahj.2019.01.003.  
39

40  
41 (16) Ferdous J, Mallick D. Norms, practices, and gendered vulnerabilities in the lower Teesta  
42 basin, Bangladesh. *Environ Dev* 2019;31:88-96. <https://doi.org/10.1016/j.envdev.2018.10.003>  
43

44 (17) Audet CM, Salato J, Blevins M, et al. Educational intervention increased referrals to  
45 allopathic care by traditional healers in three high HIV-prevalence rural districts in Mozambique.  
46 *PLoS One* 2013;8(8):e70326. doi: 10.1371/journal.pone.0070326.  
47

48  
49 (18) Willis-Shattuck M, Bidwell P, Thomas S, et al. Motivation and retention of health workers  
50 in developing countries: a systematic review. *BMC Health Serv Res* 2008;8:247. doi:  
51 10.1186/1472-6963-8-247.  
52  
53  
54  
55  
56  
57  
58  
59

1  
2  
3 (19) MacDonald T, Jackson S, Charles MC, et al. The fourth delay and community-driven  
4 solutions to reduce maternal mortality in rural Haiti: a community-based action research study.  
5 *BMC Pregnancy Childbirth* 2018;18(1):254. doi: 10.1186/s12884-018-1881-3.  
6

7  
8 (20) Patel A, Vissoci JRN, Hocker M, et al. Qualitative evaluation of trauma delays in road  
9 traffic injury patients in Maringa, Brazil. *BMC Health Serv Res* 2017;17(1):804. doi:  
10 10.1186/s12913-017-2762-6.  
11

12 (21) Mock CN, Tiska M, Adu-Ampofo M, et al. Improvements in prehospital trauma care in an  
13 African country with no formal emergency medical services. *J Trauma* 2002;53(1):90-7. doi:  
14 10.1097/00005373-200207000-00018.  
15

16 (22) Husum H, Gilbert M, Wisborg T. Training pre-hospital trauma care in low-income  
17 countries: the 'Village University' experience. *Med Teach* 2003;25(2):142-8. doi:  
18 10.1080/0142159031000092526.  
19

20 (23) El Arifeen S, Christou A, Reichenbach L, et al. Community-based approaches and  
21 partnerships: innovations in health-service delivery in Bangladesh. *Lancet* 2013;382(9909):2012-  
22 26. doi: 10.1016/S0140-6736(13)62149-2.  
23

24 (24) Rahman F, Bose S, Linnan M, et al. Cost-effectiveness of an injury and drowning  
25 prevention program in Bangladesh. *Pediatrics* 2012;130(6):e1621-8. doi: 10.1542/peds.2012-  
26 0757.  
27  
28  
29  
30

## 31 32 33 **FIGURES**

34 **Figure 1:** Structure of the public health system in Bangladesh

35  
36  
37 **Figure 2:** Continuum of care-seeking behavior as explained by community members in rural  
38 Bangladesh  
39  
40  
41  
42  
43  
44  
45  
46  
47  
48  
49  
50  
51  
52  
53  
54  
55  
56  
57  
58  
59  
60

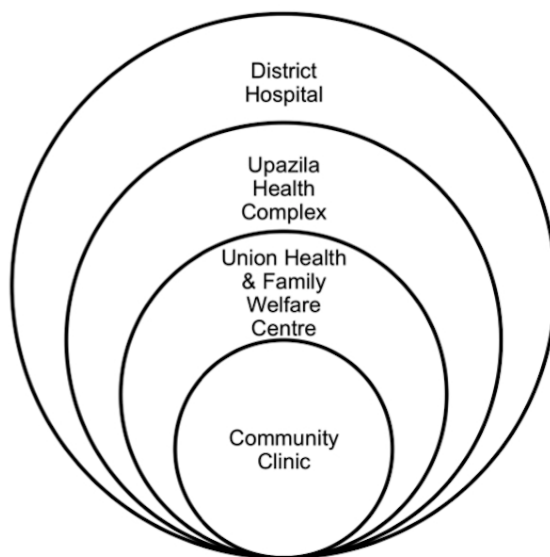

Structure of the public health system in Bangladesh

90x67mm (300 x 300 DPI)



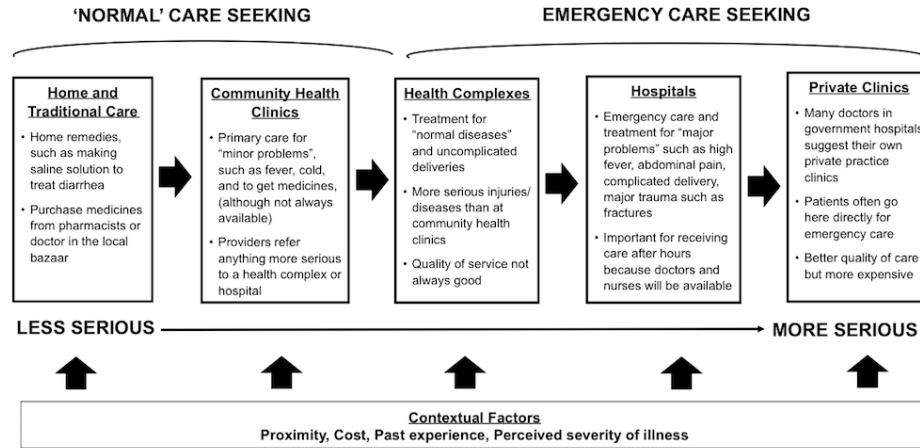

25 Continuum of care-seeking behavior as explained by community members in rural Bangladesh

26 90x50mm (300 x 300 DPI)

## Interview guide for Healthcare providers

### General Work

- 1) How long have you worked in this region?
- 2) Who do you treat? (questions pertaining to patient population)
  - a. What is the age range of patients you see?
  - b. What is the general socioeconomic background of your patients?
- 3) What are the most common reasons patients seek care? (questions pertaining to illness/disease diagnosed and treated)
  - a. Are you able to provide them appropriate care?
  - b. What type of interventions do you use?
- 4) When do patients come to you? (questions about timing)
  - a. When are you available?
- 5) Where do you see your patients? (questions pertaining to location)
  - a. Where do you get the supplies for your interventions?
  - b. Are the supplies always available?
  - c. Where do you refer patients to?
  - d. How far are these referral locations?

### Emergency Care

- 6) How do you deal with emergency situations?
- 7) What resources do you have for these situations?
- 8) Do community members know where to go when they have an emergency?
- 9) Do you feel patients understand when to seek help?
- 10) Are timely interventions possible?
- 11) Is timely transportation an issue?
- 12) What do you think could improve the situation?

## Focus Group guide for Community Members

- 1) Who is the first person you contact when you need urgent health care?
  - a. Who makes the decision to seek outside help?
  - b. Who do you notify?
- 2) What do you perceive as an emergency?
  - a. How do you decide?
- 3) When do you seek medical care in the day?
  - a. What about at night?
  - b. Is there a delay in time before seeking care? If so, Why?
- 4) Where do you go?
  - a. How far is this from home?
  - b. Why this location?
  - c. Is this where you go for care for your children as well?
  - d. Where do you go for medications?
  - e. What hours are these services available?
- 5) Do you receive the help you need?

|                    | Topic                                        | Item                                                                                                                                                                                                                                                                                                                                             | Page number                            |
|--------------------|----------------------------------------------|--------------------------------------------------------------------------------------------------------------------------------------------------------------------------------------------------------------------------------------------------------------------------------------------------------------------------------------------------|----------------------------------------|
| Title and abstract |                                              |                                                                                                                                                                                                                                                                                                                                                  |                                        |
| 1                  | Title                                        | Concise description of the nature and topic of the study<br>Identifying the study as qualitative or indicating the approach (e.g., ethnography, grounded theory) or data collection methods (e.g., interview, focus group) is recommended                                                                                                        | Title Page                             |
| 2                  | Abstract                                     | Summary of key elements of the study using the abstract format of the intended publication; typically includes background, purpose, methods, results, and conclusions                                                                                                                                                                            | Page 1                                 |
| Introduction       |                                              |                                                                                                                                                                                                                                                                                                                                                  |                                        |
| 3                  | Problem formulation                          | Description and significance of the problem/phenomenon studied; review of relevant theory and empirical work; problem statement                                                                                                                                                                                                                  | Pages 4-5                              |
| 4                  | Purpose of research question                 | Purpose of the study and specific objectives or questions                                                                                                                                                                                                                                                                                        | Page 5: lines 21-23                    |
| Methods            |                                              |                                                                                                                                                                                                                                                                                                                                                  |                                        |
| 5                  | Qualitative approach and research paradigm   | Qualitative approach (e.g., ethnography, grounded theory, case study, phenomenology, narrative research) and guiding theory if appropriate; identifying the research paradigm (e.g., postpositivist, constructivist/interpretivist) is also recommended; rationale                                                                               | Page 6: line: 15                       |
| 6                  | Researcher characteristics and reflexivity   | Researchers' characteristics that may influence the research, including personal attributes, qualifications/experience, relationship with participants, assumptions, and/or presuppositions; potential or actual interaction between researchers' characteristics and the research questions, approach, methods, results, and/or transferability | Page 7: lines 19-21                    |
| 7                  | Context                                      | Setting/site and salient contextual factors; rationale                                                                                                                                                                                                                                                                                           |                                        |
| 8                  | Sampling strategy                            | How and why research participants, documents, or events were selected; criteria for deciding when no further sampling was necessary (e.g., sampling saturation); rationale                                                                                                                                                                       | Page 7: lines 6, 15-19                 |
| 9                  | Ethical issues pertaining to human subjects  | Documentation of approval by an appropriate ethics review board and participant consent, or explanation for lack thereof; other confidentiality and data security issues                                                                                                                                                                         | Page 8: lines 18-20                    |
| 10                 | Data collection methods                      | Types of data collected; details of data collection procedures including (as appropriate) start and stop dates of data collection and analysis, iterative process, triangulation of sources/methods, and modification of procedures in response to evolving study findings; rationale                                                            | Page 6: lines 15-17                    |
| 11                 | Data collection instruments and technologies | Description of instruments (e.g., interview guides, questionnaires) and devices (e.g., audio recorders) used for data collection; if/how the instrument(s) changed over the course of the study                                                                                                                                                  | Page 6: lines 17-22; Page 7: lines 1-5 |
| 12                 | Units of study                               | Number and relevant characteristics of participants, documents, or events included in the study; level of                                                                                                                                                                                                                                        | Page 7: lines 8-14                     |

|                  |                                                                                              |                                                                                                                                                                                                                                                                                                       |                                        |
|------------------|----------------------------------------------------------------------------------------------|-------------------------------------------------------------------------------------------------------------------------------------------------------------------------------------------------------------------------------------------------------------------------------------------------------|----------------------------------------|
|                  |                                                                                              | participation (could be reported in results)                                                                                                                                                                                                                                                          |                                        |
| 13               | Data processing                                                                              | Methods for processing data prior to and during analysis, including transcription, data entry, data management and security, verification of data integrity, data coding, and anonymization/de-identification of excerpts                                                                             | Page 7: lines 21-22; Page 8: lines 1-2 |
| 14               | Data analysis                                                                                | Process by which inferences, themes, etc., were identified and developed, including the researchers involved in data analysis; usually references a specific paradigm or approach; rationale                                                                                                          | Page 8: lines 5-15                     |
| 15               | Techniques to enhance trustworthiness                                                        | Techniques to enhance trustworthiness and credibility of data analysis (e.g., member checking, audit trail, triangulation); rationale                                                                                                                                                                 | Page 8: lines 7-11                     |
| Results/findings |                                                                                              |                                                                                                                                                                                                                                                                                                       |                                        |
| 16               | Synthesis and interpretation                                                                 | Main findings (e.g., interpretations, inferences, and themes); might include development of a theory or model, or integration with prior research or theory                                                                                                                                           | Page 9: lines 6-8                      |
| 17               | Links to empirical data                                                                      | Evidence (e.g., quotes, field notes, text excerpts, photographs) to substantiate analytic findings                                                                                                                                                                                                    | Pages 10-16                            |
| Discussion       |                                                                                              |                                                                                                                                                                                                                                                                                                       |                                        |
| 18               | Integration with prior work, implications, transferability, and contribution(s) to the field | Short summary of main findings; explanation of how findings and conclusions connect to, support, elaborate on, or challenge conclusions of earlier scholarship; discussion of scope of application/generalizability; identification of unique contribution(s) to scholarship in a discipline or field | Pages 16-19                            |
| 19               | Limitations                                                                                  | Trustworthiness and limitations of findings                                                                                                                                                                                                                                                           | Page 19                                |
| Other            |                                                                                              |                                                                                                                                                                                                                                                                                                       |                                        |
| 20               | Conflicts of interest                                                                        | Potential sources of influence or perceived influence on study conduct and conclusions; how these were managed                                                                                                                                                                                        | Page 21: lines 1-2                     |
| 21               | Funding                                                                                      | Sources of funding and other support; role of funders in data collection, interpretation, and reporting                                                                                                                                                                                               | Page 20: lines 20-22                   |

# BMJ Open

## Applying the Three Delays Model to understand emergency care seeking and delivery in rural Bangladesh: a qualitative study

|                                 |                                                                                                                                                                                                                                                                                                                                                                                                                                                                                                                                                                                                                                                                      |
|---------------------------------|----------------------------------------------------------------------------------------------------------------------------------------------------------------------------------------------------------------------------------------------------------------------------------------------------------------------------------------------------------------------------------------------------------------------------------------------------------------------------------------------------------------------------------------------------------------------------------------------------------------------------------------------------------------------|
| Journal:                        | <i>BMJ Open</i>                                                                                                                                                                                                                                                                                                                                                                                                                                                                                                                                                                                                                                                      |
| Manuscript ID                   | bmjopen-2020-042690.R2                                                                                                                                                                                                                                                                                                                                                                                                                                                                                                                                                                                                                                               |
| Article Type:                   | Original research                                                                                                                                                                                                                                                                                                                                                                                                                                                                                                                                                                                                                                                    |
| Date Submitted by the Author:   | 19-Nov-2020                                                                                                                                                                                                                                                                                                                                                                                                                                                                                                                                                                                                                                                          |
| Complete List of Authors:       | Shah, Bansari; Johns Hopkins School of Medicine, Emergency Medicine<br>Krishnan, Nandita; The George Washington University Milken Institute of Public Health, Prevention and Community Health<br>Kodish, Stephen; Pennsylvania State University University Park, Nutritional Sciences<br>Yenokyan, G; Johns Hopkins University Bloomberg School of Public Health, Biostatistics<br>Fatema, Kaniz; Centre for Injury Prevention and Research Bangladesh<br>Burhan Uddin, Kazi; Centre for Injury Prevention and Research Bangladesh<br>Rahman, AKM; Center for Injury Prevention Research, Bangladesh<br>Razzak, Junaid; Johns Hopkins University, Emergency Medicine |
| <b>Primary Subject Heading</b>: | Emergency medicine                                                                                                                                                                                                                                                                                                                                                                                                                                                                                                                                                                                                                                                   |
| Secondary Subject Heading:      | Public health, Qualitative research                                                                                                                                                                                                                                                                                                                                                                                                                                                                                                                                                                                                                                  |
| Keywords:                       | ACCIDENT & EMERGENCY MEDICINE, PUBLIC HEALTH, QUALITATIVE RESEARCH                                                                                                                                                                                                                                                                                                                                                                                                                                                                                                                                                                                                   |
|                                 |                                                                                                                                                                                                                                                                                                                                                                                                                                                                                                                                                                                                                                                                      |

SCHOLARONE™  
Manuscripts



I, the Submitting Author has the right to grant and does grant on behalf of all authors of the Work (as defined in the below author licence), an exclusive licence and/or a non-exclusive licence for contributions from authors who are: i) UK Crown employees; ii) where BMJ has agreed a CC-BY licence shall apply, and/or iii) in accordance with the terms applicable for US Federal Government officers or employees acting as part of their official duties; on a worldwide, perpetual, irrevocable, royalty-free basis to BMJ Publishing Group Ltd ("BMJ") its licensees and where the relevant Journal is co-owned by BMJ to the co-owners of the Journal, to publish the Work in this journal and any other BMJ products and to exploit all rights, as set out in our [licence](#).

The Submitting Author accepts and understands that any supply made under these terms is made by BMJ to the Submitting Author unless you are acting as an employee on behalf of your employer or a postgraduate student of an affiliated institution which is paying any applicable article publishing charge ("APC") for Open Access articles. Where the Submitting Author wishes to make the Work available on an Open Access basis (and intends to pay the relevant APC), the terms of reuse of such Open Access shall be governed by a Creative Commons licence – details of these licences and which [Creative Commons](#) licence will apply to this Work are set out in our licence referred to above.

Other than as permitted in any relevant BMJ Author's Self Archiving Policies, I confirm this Work has not been accepted for publication elsewhere, is not being considered for publication elsewhere and does not duplicate material already published. I confirm all authors consent to publication of this Work and authorise the granting of this licence.

1  
2  
3 **Applying the Three Delays Model to understand emergency care seeking and delivery in**  
4 **rural Bangladesh: a qualitative study**  
5  
6  
7  
8  
9

10 **Authors:** Bansari Shah<sup>1</sup>, Nandita Krishnan<sup>2</sup>, Stephen R. Kodish<sup>3</sup>, Gayane Yenokyan<sup>4</sup>, Kaniz  
11  
12 Fatema<sup>5</sup>, Kazi Burhan Uddin<sup>5</sup>, Fazlur Rahman<sup>5</sup>, Junaid Razzak<sup>1</sup>  
13

14 **Author Affiliations:**

15  
16  
17 <sup>1</sup> Johns Hopkins School of Medicine, Department of Emergency Medicine, Baltimore, Maryland,  
18  
19 USA  
20

21 <sup>2</sup> Milken Institute School of Public Health, The George Washington University, Department of  
22  
23 Prevention and Community Health, Washington, DC, USA  
24

25  
26 <sup>3</sup> Pennsylvania State University, Departments of Biobehavioral Health and Nutritional Sciences  
27  
28 Pennsylvania, USA  
29

30  
31 <sup>4</sup> Johns Hopkins Bloomberg School of Public Health, Department of Biostatistics, Baltimore,  
32  
33 Maryland, USA  
34

35  
36 <sup>5</sup> Center for Injury Prevention and Research, Bangladesh (CIPRB), Dhaka, Bangladesh  
37

38 Corresponding Author:

39  
40 Nandita Krishnan

41  
42 950 New Hampshire Avenue NW  
43

44  
45 Washington, D.C. 20052  
46

47  
48 E-mail: nkrishnan@gwu.edu  
49

50  
51  
52 Word count: 4,104  
53  
54  
55  
56  
57  
58  
59  
60



## ABSTRACT

**Objectives:** The Three Delays Model has been commonly used to understand and prevent maternal mortality but has not been systematically applied to emergency medical conditions more generally. The objective of this study was to identify delays in emergency medical care seeking and delivery in rural Bangladesh and factors contributing to these delays by using the Three Delays Model as a framework.

**Design:** A qualitative approach was used. Data was collected through focus group discussions and in-depth interviews using semi-structured guides. Two analysts jointly developed a codebook iteratively and conducted a thematic analysis to triangulate results.

**Setting:** Six unions in Raiganj sub-district of Bangladesh.

**Participants:** Eight focus group discussions with community members (n=59) and eight in-depth interviews with healthcare providers

**Results:** Delays in the decision to seek care and timely receipt of care upon reaching a health facility were most prominent. The main factors influencing care-seeking decisions included ability to recognize symptoms and decision-making power. Staff and resource shortages and lack of training contributed to delays in receiving care. Delay in reaching care was not perceived as a salient barrier. Both community members and healthcare providers expressed interest in receiving training to improve management of emergency conditions.

**Conclusions:** The Three Delays Model is a practical framework that can be useful for understanding barriers to emergency care and developing more tailored interventions. In rural Bangladesh, training community members and healthcare providers to recognize symptoms and manage acute conditions can reduce delays in care seeking and receiving adequate care at health facilities.

1  
2  
3 **Keywords:** Emergency care, Three Delays Model, Bangladesh, Qualitative research  
4  
5  
6  
7  
8  
9  
10  
11  
12  
13  
14  
15  
16  
17  
18  
19  
20  
21  
22  
23  
24  
25  
26  
27  
28  
29  
30  
31  
32  
33  
34  
35  
36  
37  
38  
39  
40  
41  
42  
43  
44  
45  
46  
47  
48  
49  
50  
51  
52  
53  
54  
55  
56  
57  
58  
59  
60

For peer review only

### Strengths and limitations of this study

- This is one of few studies to apply the Three Delays Framework to the broader context of emergency medical conditions
- Purposive sampling of sub-groups of community members and healthcare providers facilitated data triangulation
- Participants were identified by local community leaders and their views may not be representative of all potential participants
- Due to logistical constraints, data was collected in only six of nine unions, potentially limiting generalizability

## INTRODUCTION

Twenty four million deaths related to emergency medical conditions occur in low and middle-income countries (LMICs) annually, accounting for an estimated 1,023 million disability-adjusted life years (DALYs) and 932 million years of life lost(1). This includes both communicable and non-communicable diseases, with ischemic heart disease and cerebrovascular disease causing the highest mortality burden, and unintentional injuries causing the most DALYs(1). In Bangladesh, stroke and ischemic heart disease are the leading causes of death(2). Additionally, unintentional injuries contribute to a large burden of premature death. For instance, drowning(3) and road traffic injuries(4) result in substantial morbidity and mortality. Road traffic injuries exert a particularly high burden in rural Bangladesh and largely impact individuals between the ages of 25 and 64 years, a highly productive segment of the population(5). This burden could be reduced by improving emergency and acute care seeking and delivery.

Emergency care involves different levels of services, beginning with recognition of symptoms and care provided by laypersons at the scene of the injury or illness episode, and continuing through the care provided in a health facility. The quality and timeliness of care at each level is crucial to survival. The Three Delays Model, originally developed in the context of maternal mortality in low-income settings provides a useful framework to examine factors influencing the timeliness of care(6). According to this model, adverse outcomes from obstetric complications are attributable to three delays between the onset of complications and their ultimate outcome. The first delay is the delay in the decision to seek care, the second delay is related to reaching an appropriate health facility, and the third delay occurs once the patient reaches the health facility and waits to be seen by a medical professional. These delays are in turn influenced by socioeconomic factors, such as wealth and female education, cultural factors

1  
2  
3 such as beliefs and customs, structural factors such as accessibility of care, and health system  
4  
5 level factors such as quality of care.  
6  
7

8  
9 While the literature is consistent on the factors influencing the three delays, the relative  
10 contribution of each of these delays varies across countries. A study in India(7) found that the  
11 first two delays were the main contributors to maternal death, while a study in Malawi(8) found  
12 that the third delay contributed the most to maternal death. Another study applied this model to  
13 understand care seeking and receipt for children with pneumonia in the Peruvian Amazon and  
14 found that the first and third delay were most salient(9). Additionally, differences may exist  
15 across regions within countries. In rural areas, complications are more likely to result in adverse  
16 outcomes than in urban areas as all three delays in care seeking and delivery tend to be present  
17 and exert an interactive effect(7). A study on care seeking for obstetric complications in rural  
18 Bangladesh found that socioeconomic factors such as wealth, women's literacy and women's  
19 employment contributed to the delay in the decision to seek care, while service factors such as  
20 proximity to the health facility and availability of adequate obstetric services at the facility  
21 contributed to all three delays(10).  
22  
23  
24  
25  
26  
27  
28  
29  
30  
31  
32  
33  
34  
35  
36  
37  
38

39 The Three Delays Model has been widely applied to understand maternal mortality but it  
40 has not been systematically applied to the context of emergency medical conditions more  
41 broadly. This model could serve as a useful framework for developing and evaluating  
42 interventions for emergency medical conditions owing to similarities in the factors influencing  
43 care seeking and delivery for obstetric emergencies and other emergency medical conditions(11).  
44 Therefore, the aims of this study were: (i) to understand the contribution of the three delays to  
45 emergency care seeking and delivery in rural Bangladesh and identify factors influencing each of  
46 the delays, and (ii) to obtain recommendations from providers and patients to improve  
47  
48  
49  
50  
51  
52  
53  
54  
55  
56  
57  
58  
59  
60

1  
2  
3 emergency care. Findings can inform interventions aimed at reducing delays in emergency care  
4 seeking and delivery and reduce the burden of morbidity and mortality from these conditions in  
5 rural Bangladesh.  
6  
7  
8  
9

## 10 11 12 13 **METHODS**

### 14 15 **Study Setting**

16  
17  
18 This study was conducted in the Raiganj sub-district of Bangladesh, a predominantly rural area  
19 with a population of about 318,000(12). Raiganj is divided into nine unions. In each union, there  
20 are multiple community health centers (CHCs), which are the community's primary point of  
21 access to formal care. Each union also has one health and family welfare center and child welfare  
22 clinic. For higher levels of care, each sub-district has a health complex. The highest level of care  
23 is the district hospital, which delivers care in major specialty areas (Figure 1).  
24  
25  
26  
27  
28  
29  
30  
31  
32  
33  
34  
35

### 36 **Study Design and Data Collection**

37  
38  
39 An applied qualitative approach was used for this study, which included focus group discussions  
40 (FGDs) with community members and in-depth interviews (IDIs) with healthcare providers. Data  
41 collection took place in June 2016. Semi-structured guides were used for FGDs and IDIs  
42 (Supplementary File). The semi-structured format allowed for probing and follow-up questions  
43 to gain more clarity from participants. The interview guides for healthcare providers covered the  
44 themes of management of acute conditions in CHCs, services and resources available to manage  
45 these conditions, and provider perceptions of community members' awareness of where and  
46 when to seek care for emergency conditions. The focus group guide explored community  
47  
48  
49  
50  
51  
52  
53  
54  
55  
56  
57  
58  
59  
60

1  
2  
3 members' perceptions of emergency conditions, how care seeking decisions are made, and  
4 access to and availability of care. The guides were developed with the help of Center of Injury  
5 Prevention and Research, Bangladesh (CIPRB) researchers using the rapid appraisal approach  
6 for community health assessments. The guides were developed in English, translated into  
7 Bengali and then back translated by CIPRB researchers.  
8  
9  
10  
11  
12  
13

14  
15 FGDs and IDIs were conducted in six of the nine unions. A purposive sampling strategy was  
16 used to elicit perspectives from different groups of community members and different types of  
17 healthcare providers. Two FGDs were held with each of the following groups of stakeholders:  
18 men, women, the elderly, and community leaders, for a total of eight FGDs (n=59). In order to  
19 provide an open environment where participants felt comfortable sharing their thoughts, the  
20 FGDs with each stakeholder group were held separately. Eight IDIs were conducted with  
21 different types of health care providers: community health center providers (n=4), family welfare  
22 visitor (n=1), sub-assistant community medical officers (n=2) and upazila health and family  
23 planning officer (n=1).  
24  
25  
26  
27  
28  
29  
30  
31  
32  
33  
34  
35  
36

37 Community members were recruited by local community leaders. They were chosen based on  
38 their involvement in community affairs, availability, and willingness to speak openly. Healthcare  
39 providers were recruited by CIPRB researchers. As there are limited healthcare providers in each  
40 community, we approached all of those who were available and willing to speak to us. All  
41 participants were over the age of 18. All FGDs and IDIs were conducted by two local public  
42 health field officers from CIPRB (KF and KBU). Both officers had significant field experience  
43 doing qualitative data collection and contributed to developing the guides. The FGDs and IDIs  
44 were digitally recorded with permission from participants. Field notes were also taken by the  
45  
46  
47  
48  
49  
50  
51  
52  
53  
54  
55  
56  
57  
58  
59  
60

1  
2  
3 interviewers. All data were collected in Bengali, transcribed verbatim and translated into English  
4  
5 for analysis by CIPRB researchers. On average, each interview/focus group lasted 30 minutes.  
6  
7  
8  
9

## 10 11 **Data Analysis**

12  
13  
14 Transcripts were analyzed with a thematic approach using Dedoose version 7.6.21  
15  
16 (SocioCultural Research Consultants, LLC, Los Angeles, California, USA). The analysis  
17  
18 combined an inductive and deductive approach. Two analysts (NK and SK) independently  
19  
20 reviewed the transcripts and jointly developed a codebook, which consisted of some pre-defined  
21  
22 themes as well as additional themes that emerged from the data. The same analysts  
23  
24 independently coded extracts from multiple transcripts using the initial codebook and registered  
25  
26 an inter-coder reliability score of 0.75. The analysts discussed discrepancies in the use of codes  
27  
28 to ensure that codes were being applied uniformly. As additional themes and sub-themes  
29  
30 emerged, the analysts modified the codebook. The same analysts coded all transcripts using the  
31  
32 final version of the codebook. Analytic memos were used to identify recurring patterns and  
33  
34 themes in coded text segments.  
35  
36  
37  
38  
39  
40  
41  
42

## 43 **Ethics**

44  
45  
46 All participants provided informed oral consent. Ethical approval for this study was granted by  
47  
48 the Johns Hopkins Medicine Institutional Review Board and the Ethical Review Committee of  
49  
50 the Bangladesh Medical Research Council.  
51  
52  
53  
54  
55  
56  
57  
58  
59  
60



### **Patient and Public Involvement**

Patients or the public were not involved in the design, or conduct, or reporting, or dissemination plans of our research

## **RESULTS**

IDIs and FGDs revealed factors across a continuum of care affecting timeliness and quality of emergency medical services in rural Bangladesh . Salient themes surrounding factors affecting care are organized and presented according to the Three Delays Model:

### **Delay 1: Delayed decision to seek care**

The decision to seek care was influenced by several socio-contextual factors, most notably perceived severity of illness. Community members perceived symptoms such as high fever, cold, abdominal pain or fainting to be indicative of “major problems”. They perceived a range of conditions to constitute emergencies, ranging from cuts, burns and poisoning, to drowning, accidents, stroke and heart attacks.

Greater distances from health facilities, high cost and negative past experiences at health facilities contributed to delays in deciding to seek care. However, perceived severity of illness superseded these other factors. If the illness was perceived to be very severe, participants reported that care was sought immediately regardless of these other factors as this focus group exchange with female community members illustrated:

1  
2  
3 *Participant 5: During my pregnancy, at the time of delivery my water was broken*  
4 *but there was no pain, so we were waiting the whole night and went to the*  
5 *Shirajgonj hospital at the morning.*

6  
7  
8  
9  
10  
11 *Moderator: Your water broke but you wait for morning, why not go to the*  
12 *hospital that time?*

13  
14  
15  
16 *Participant 5: Because the time was midnight, so we wait for morning.*

17  
18  
19 *Moderator: If these types of emergency arise do you go as soon as possible or*  
20 *wait for some time?*

21  
22  
23  
24 *Participant 3: No, no. When her mother-in-law became sick, they took her*  
25 *immediately.*

26  
27  
28  
29 Additionally, cultural factors including female decision-making power and role of traditional  
30 medicine influenced care seeking decisions. The majority of participants reported that the  
31 decision to seek care was made by the head of the household, who was typically the husband. In  
32 some cases, family elders such as mothers-in law made care seeking decisions.

33  
34  
35  
36  
37  
38  
39 *In our village we are very close to each other, we ask [advice from] one another*  
40 *and then take a decision where to go; mainly the family head takes the final*  
41 *decision.*

42  
43  
44  
45  
46  
47 - Male community member

48  
49  
50 Based on these factors, for most community members, a clear hierarchy to care seeking existed  
51 (Figure 2). The first line of care seeking, particularly for women, usually consisted of using  
52 home remedies or medications and consulting traditional village doctors or pharmacists at the  
53  
54  
55  
56  
57  
58  
59

1  
2  
3 local neighborhood or “bazaar.” For primary care and what they perceived as “normal” illnesses,  
4  
5 community members reported going to CHCs to seek treatment. For more serious issues such as  
6  
7 pregnancy, care was usually sought at a health complex, which was perceived to have more staff  
8  
9 and services than CHCs. For what they perceived as emergencies, community members reported  
10  
11 seeking care at private clinics or hospitals, where they noted, “doctors are available all the time.”  
12  
13

14  
15 *Q: If any one of you or your family members get sick where do you go first?*

16  
17  
18 *R: At first, we go to the community clinic, then local pharmacy and if it is getting*  
19  
20 *serious than go to the upazila health complex or district hospital. But upazila*  
21  
22 *health complex doesn't give good service so most of the time we go to the private*  
23  
24 *clinic.*  
25  
26

27  
28 – Male community member  
29  
30  
31  
32  
33

### 34 **Delay 2: Delayed arrival at health facility**

35

36  
37 When decisions to seek care were made, participants reported that CHCs were largely accessible  
38  
39 for most community members. A few participants reported that delays in transportation made it  
40  
41 difficult to quickly reach higher-level health facilities in the event of an emergency condition,  
42  
43 but most participants said that transportation was not an issue and several modes, such as  
44  
45 rickshaws and vans were available. Distances to hospitals varied depending on the union. In  
46  
47 some unions, hospitals were between 3-5 kilometers away from the village and took  
48  
49 approximately 15-20 minutes to reach, but in some unions, the nearest hospital was 10-20  
50  
51 kilometers away and took more than an hour to reach.  
52  
53  
54  
55  
56  
57  
58  
59  
60

1  
2  
3 Community members mostly rely on arranging their own transportation to health facilities.  
4  
5 According to CHC providers, patients had good knowledge and awareness of where to seek care  
6  
7 but for some patients, distance and cost could be barriers in this setting.  
8  
9

10  
11 *If any accident patient is very serious then they directly go to the hospital,*  
12  
13 *because they know we can't handle that.*  
14

15  
16 – Upazila health and family planning officer  
17  
18  
19  
20  
21  
22  
23  
24

### 25 **Delay 3: Delayed provision of adequate care**

26  
27  
28 CHCs represent the first point of entry in to the formal healthcare system. However, lack of  
29  
30 adequate training of providers and shortage of resources and staff contributed to delays in  
31  
32 patients receiving care at these facilities. CHC providers explained that they were only able to  
33  
34 provide basic first aid for injuries and accidents. In case of more complex conditions, they  
35  
36 referred patients to the nearest hospital or health complex to manage emergency conditions.  
37  
38

39  
40 *Mainly we give first aid treatment and health education for diarrhea, fever, cold*  
41  
42 *etc. If any patient came with a serious problem then we referred them to the*  
43  
44 *health complex for better treatment.*  
45  
46

47 – Community health center provider  
48  
49

50  
51 CHCs reported carrying medicines and supplies for basic first aid, family planning, pregnancy-  
52  
53 related supplementation and common illnesses such as fever. However, stock outs were common  
54  
55 and community members indicated that people got medicines “depending on availability.”  
56  
57  
58  
59

1  
2  
3 Most CHCs were equipped with basic equipment such as blood pressure machines and  
4  
5 glucometers, with some exceptions. While more sophisticated medical equipment such as  
6  
7 nebulizers and x-ray machines were available in the upazila health complex, lack of training and  
8  
9 infrastructure were barriers to their utilization within clinics.  
10  
11

12  
13 *“We have an operation room but it’s not used, we need a surgeon and anesthetist*  
14  
15 *for that. We have x-ray machine but it is not working.”*  
16  
17

18 - Upazila health and family planning officer  
19  
20

21 CHCs varied in terms of number of staff members available during working hours, ranging from  
22  
23 one to four individuals. CHCs had a mix of office-level and field-level staff and specialized  
24  
25 providers such as gynecologists were not commonly reported. Clinic staff reported that CHCs  
26  
27 were open six days a week, for approximately six hours each day. However, according to  
28  
29 community members, CHCs are open only for four to five days a week, for about three to four  
30  
31 hours each day. A community elder remarked: *“if we go to the clinic after 1 pm, they say it’s*  
32  
33 *closed.”* In contrast, the hospitals were open 24 hours, seven days a week, but hospitals are  
34  
35 farther away from CHCs for most people in need of urgent care.  
36  
37  
38  
39

40 Additionally, some community members felt that upon reaching hospitals, patients were  
41  
42 prioritized based on connections they had with doctors or ability to pay, which resulted in delays  
43  
44 in being seen by a healthcare provider and receiving treatment. Community members also felt  
45  
46 that shortage of resources such as medications contributed to delays in receiving timely care once  
47  
48 they reached the health facility:  
49  
50  
51  
52  
53  
54  
55  
56  
57  
58  
59  
60

1  
2  
3 *“Raigonj hospital has no medicine and Jia medical also has very limited*  
4 *medicine. Last week I go to Jia medical college hospital to visit a patient and it*  
5 *was a very helpless situation.*

6  
7  
8  
9  
10  
11 - Community elder  
12  
13  
14  
15

## 16 **Recommendations to improve emergency care**

### 17 *Providers*

18  
19  
20  
21  
22  
23  
24  
25  
26  
27  
28  
29  
30  
31  
32  
33  
34  
35  
36  
37  
38  
39  
40  
41  
42  
43  
44  
45  
46  
47  
48  
49  
50  
51  
52  
53  
54  
55  
56  
57  
58  
59  
60  
Providers expressed a need for and interest in receiving more training to handle acute conditions. They felt that this could help prevent deaths and save time and money for patients. Providers also felt that patients did not have confidence in their abilities and skills. Providers wanted to learn more about management of emergency conditions.

*[We need] gauze, bandage and suturing materials but we have very limited knowledge on suturing and other subjects. If we get some training on it, then we can provide a better service*

– Community health center provider

*“Emergency management of acute care, acute MI (myocardial infarction), near drowning, shock – this type of management training we need the most. Sometimes we refer patient for treatment but patient dies on the road. If we can manage it here, the life can be saved.”*

- Upazila health and family planning officer

1  
2  
3 Providers also recommended that the supply of medicines to the CHCs be improved, particularly  
4  
5 for antibiotics, which were often in low supply and expensive for patients to purchase. Other  
6  
7 needs expressed by providers were having more trained staff in CHCs, particularly trained  
8  
9 doctors, surgeons and assistants and better infrastructure.  
10  
11  
12  
13  
14  
15

### 16 *Community members*

17  
18  
19 Community members felt that providers at CHCs were insufficiently trained and could only  
20  
21 provide basic primary care. They also felt that providers were not good at diagnosing illnesses  
22  
23 and could only treat “common” diseases such as fever and cold. Another concern was that many  
24  
25 providers were more invested in their own private practices and therefore did not offer adequate  
26  
27 care to patients at the CHC. Community members suggested enforcing better regulations over  
28  
29 doctors with private practices as well as eliminating favoritism towards patients.  
30  
31  
32

33  
34 Community members noted cyclical shortages of medicines at the CHCs and felt that better  
35  
36 monitoring of supply by authorities could address these shortages. They were also concerned that  
37  
38 providers at CHCs were prescribing unnecessary medications based on what was available rather  
39  
40 than what was required.  
41  
42

43  
44 Like providers, community members felt that more trained staff and equipment was needed at  
45  
46 CHCs.  
47

48  
49 *“We need a full time doctor here for any emergency. In case of any emergency*  
50  
51 *like heart disease, he/she can manage it immediately.”*  
52  
53

54 - Female community member  
55  
56  
57  
58  
59  
60

1  
2  
3 Community members were enthusiastic about receiving training to provide first aid and manage  
4 acute conditions. A few women mentioned that they already received training as caregivers,  
5  
6 known as Anchal Mas, to deliver basic first aid.  
7  
8  
9  
10

11  
12 *If any children cut his or her hand or leg came to me, I have first aid training*  
13 *from CIPRB. I was an Anchal Ma. I have cotton gaze and medicine, so they came*  
14 *to me. At first, I clean the wound, then put the bandage*  
15  
16  
17  
18

19  
20 – Female community member  
21  
22  
23  
24

## 25 **DISCUSSION**

26  
27 In rural Bangladesh, we found that several socio-contextual factors influenced care  
28 seeking decisions, which could contribute to delays in the decision to seek care. Delays in  
29 receiving care at the health facility were also a barrier to timely management of emergency  
30 conditions, whereas delays in reaching health facilities were less of a primary concern due to a  
31 tiered health system with multiple levels of care available to most of the population.  
32  
33  
34  
35  
36  
37  
38

39 Factors contributing to care seeking decisions included perceived severity of illness,  
40 proximity to and timings of health facilities, cost of care, and past experiences receiving care.  
41 Among these, perceived illness severity appeared to be the strongest factor influencing decision-  
42 making. Determining severity of an illness episode depends on the ability of community  
43 members to recognize signs and symptoms of acute conditions. Although community members  
44 differentiated between ‘normal’ and ‘emergency’ conditions, basing care seeking decisions on  
45 the severity of symptoms is limited by individual capacity to understand what is biomedically  
46 urgent. Moreover, seemingly mild or non-specific symptoms, such as nausea could be indicative  
47  
48  
49  
50  
51  
52  
53  
54  
55  
56  
57  
58  
59  
60



1  
2  
3 of serious conditions such as myocardial infarctions(13). Prior research has shown that the  
4 inability to recognize symptoms is a barrier to timely care seeking(7) and that awareness of  
5 symptoms for emergency conditions such as heart attacks and stroke is low (14,15). Therefore,  
6 an important component of a community-based program might include education sessions  
7 focused on screening and identifying signs and symptoms of life threatening versus less serious  
8 conditions.

9  
10  
11  
12 We also found that in this context, cultural factors such as the strong role of traditional  
13 medicine as well as the weak decision-making power, particularly for younger women underpin  
14 health-related decisions. Of all the demographic groups, women were more likely to report first  
15 seeking care from the village doctor. This could stem from gender norms in Bangladesh, which  
16 dictate that women should remain at home and should be accompanied by men in public spaces  
17 (16). As village doctors are located closer to home, it may be easier and more acceptable for  
18 women to go to the “bazaar” unaccompanied. In this setting, successful interventions to improve  
19 emergency care seeking may need to target key decision makers, such as traditional healers, male  
20 heads of household, or family elders. For instance, in Mozambique, traditional healers were  
21 utilized as part of successful intervention to increase referral rates to health facilities(17).

22  
23  
24  
25  
26  
27  
28  
29  
30  
31  
32  
33  
34  
35  
36  
37  
38  
39  
40  
41  
42  
43  
44  
45  
46  
47  
48  
49  
50  
51  
52  
53  
54  
55  
56  
57  
58  
59  
60  
61  
62  
63  
64  
65  
66  
67  
68  
69  
70  
71  
72  
73  
74  
75  
76  
77  
78  
79  
80  
81  
82  
83  
84  
85  
86  
87  
88  
89  
90  
91  
92  
93  
94  
95  
96  
97  
98  
99  
100  
101  
102  
103  
104  
105  
106  
107  
108  
109  
110  
111  
112  
113  
114  
115  
116  
117  
118  
119  
120  
121  
122  
123  
124  
125  
126  
127  
128  
129  
130  
131  
132  
133  
134  
135  
136  
137  
138  
139  
140  
141  
142  
143  
144  
145  
146  
147  
148  
149  
150  
151  
152  
153  
154  
155  
156  
157  
158  
159  
160  
161  
162  
163  
164  
165  
166  
167  
168  
169  
170  
171  
172  
173  
174  
175  
176  
177  
178  
179  
180  
181  
182  
183  
184  
185  
186  
187  
188  
189  
190  
191  
192  
193  
194  
195  
196  
197  
198  
199  
200  
201  
202  
203  
204  
205  
206  
207  
208  
209  
210  
211  
212  
213  
214  
215  
216  
217  
218  
219  
220  
221  
222  
223  
224  
225  
226  
227  
228  
229  
230  
231  
232  
233  
234  
235  
236  
237  
238  
239  
240  
241  
242  
243  
244  
245  
246  
247  
248  
249  
250  
251  
252  
253  
254  
255  
256  
257  
258  
259  
260  
261  
262  
263  
264  
265  
266  
267  
268  
269  
270  
271  
272  
273  
274  
275  
276  
277  
278  
279  
280  
281  
282  
283  
284  
285  
286  
287  
288  
289  
290  
291  
292  
293  
294  
295  
296  
297  
298  
299  
300  
301  
302  
303  
304  
305  
306  
307  
308  
309  
310  
311  
312  
313  
314  
315  
316  
317  
318  
319  
320  
321  
322  
323  
324  
325  
326  
327  
328  
329  
330  
331  
332  
333  
334  
335  
336  
337  
338  
339  
340  
341  
342  
343  
344  
345  
346  
347  
348  
349  
350  
351  
352  
353  
354  
355  
356  
357  
358  
359  
360  
361  
362  
363  
364  
365  
366  
367  
368  
369  
370  
371  
372  
373  
374  
375  
376  
377  
378  
379  
380  
381  
382  
383  
384  
385  
386  
387  
388  
389  
390  
391  
392  
393  
394  
395  
396  
397  
398  
399  
400  
401  
402  
403  
404  
405  
406  
407  
408  
409  
410  
411  
412  
413  
414  
415  
416  
417  
418  
419  
420  
421  
422  
423  
424  
425  
426  
427  
428  
429  
430  
431  
432  
433  
434  
435  
436  
437  
438  
439  
440  
441  
442  
443  
444  
445  
446  
447  
448  
449  
450  
451  
452  
453  
454  
455  
456  
457  
458  
459  
460  
461  
462  
463  
464  
465  
466  
467  
468  
469  
470  
471  
472  
473  
474  
475  
476  
477  
478  
479  
480  
481  
482  
483  
484  
485  
486  
487  
488  
489  
490  
491  
492  
493  
494  
495  
496  
497  
498  
499  
500  
501  
502  
503  
504  
505  
506  
507  
508  
509  
510  
511  
512  
513  
514  
515  
516  
517  
518  
519  
520  
521  
522  
523  
524  
525  
526  
527  
528  
529  
530  
531  
532  
533  
534  
535  
536  
537  
538  
539  
540  
541  
542  
543  
544  
545  
546  
547  
548  
549  
550  
551  
552  
553  
554  
555  
556  
557  
558  
559  
560  
561  
562  
563  
564  
565  
566  
567  
568  
569  
570  
571  
572  
573  
574  
575  
576  
577  
578  
579  
580  
581  
582  
583  
584  
585  
586  
587  
588  
589  
590  
591  
592  
593  
594  
595  
596  
597  
598  
599  
600  
601  
602  
603  
604  
605  
606  
607  
608  
609  
610  
611  
612  
613  
614  
615  
616  
617  
618  
619  
620  
621  
622  
623  
624  
625  
626  
627  
628  
629  
630  
631  
632  
633  
634  
635  
636  
637  
638  
639  
640  
641  
642  
643  
644  
645  
646  
647  
648  
649  
650  
651  
652  
653  
654  
655  
656  
657  
658  
659  
660  
661  
662  
663  
664  
665  
666  
667  
668  
669  
670  
671  
672  
673  
674  
675  
676  
677  
678  
679  
680  
681  
682  
683  
684  
685  
686  
687  
688  
689  
690  
691  
692  
693  
694  
695  
696  
697  
698  
699  
700  
701  
702  
703  
704  
705  
706  
707  
708  
709  
710  
711  
712  
713  
714  
715  
716  
717  
718  
719  
720  
721  
722  
723  
724  
725  
726  
727  
728  
729  
730  
731  
732  
733  
734  
735  
736  
737  
738  
739  
740  
741  
742  
743  
744  
745  
746  
747  
748  
749  
750  
751  
752  
753  
754  
755  
756  
757  
758  
759  
760  
761  
762  
763  
764  
765  
766  
767  
768  
769  
770  
771  
772  
773  
774  
775  
776  
777  
778  
779  
780  
781  
782  
783  
784  
785  
786  
787  
788  
789  
790  
791  
792  
793  
794  
795  
796  
797  
798  
799  
800  
801  
802  
803  
804  
805  
806  
807  
808  
809  
810  
811  
812  
813  
814  
815  
816  
817  
818  
819  
820  
821  
822  
823  
824  
825  
826  
827  
828  
829  
830  
831  
832  
833  
834  
835  
836  
837  
838  
839  
840  
841  
842  
843  
844  
845  
846  
847  
848  
849  
850  
851  
852  
853  
854  
855  
856  
857  
858  
859  
860  
861  
862  
863  
864  
865  
866  
867  
868  
869  
870  
871  
872  
873  
874  
875  
876  
877  
878  
879  
880  
881  
882  
883  
884  
885  
886  
887  
888  
889  
890  
891  
892  
893  
894  
895  
896  
897  
898  
899  
900  
901  
902  
903  
904  
905  
906  
907  
908  
909  
910  
911  
912  
913  
914  
915  
916  
917  
918  
919  
920  
921  
922  
923  
924  
925  
926  
927  
928  
929  
930  
931  
932  
933  
934  
935  
936  
937  
938  
939  
940  
941  
942  
943  
944  
945  
946  
947  
948  
949  
950  
951  
952  
953  
954  
955  
956  
957  
958  
959  
960  
961  
962  
963  
964  
965  
966  
967  
968  
969  
970  
971  
972  
973  
974  
975  
976  
977  
978  
979  
980  
981  
982  
983  
984  
985  
986  
987  
988  
989  
990  
991  
992  
993  
994  
995  
996  
997  
998  
999  
1000

Delayed provision of care occurs once the patient reaches the health facility and waits to be seen by a medical professional. Staffing and resource shortages often hindered the delivery of timely and high quality medical care. We also found that community members felt that healthcare providers in CHCs lacked sufficient training to provide high quality acute care, a view that was echoed by healthcare providers themselves. When individuals sought emergency care at CHCs, they were usually referred to the health complex or hospitals as CHCs lacked the resources and capacity to treat these conditions. This resulted in delays that could be avoided if

1  
2  
3 CHCs received adequate resources and providers are trained in management of emergency  
4 conditions. Building capacity of CHC providers in the management of emergency conditions can  
5 reduce the need for referrals. Even if referrals are required, better management of emergency  
6 conditions at the CHC level can stabilize the patient's condition, improving the likelihood of a  
7 favorable outcome once the patient reaches the tertiary healthcare facility. We did find a high  
8 level of interest among healthcare providers to receive additional training in emergency care.  
9  
10 Therefore, it may be possible to adapt successful emergency care training programs from other  
11 similar countries to this setting. Compared to other LMICs where health worker attrition is  
12 high(18), rural Bangladesh has a community health worker (CHW) cadre which is prioritized and  
13 enjoys relatively good job security; therefore, investments in CHW training may see long-term  
14 improvements in health through better care practices and improved patient satisfaction. Improved  
15 monitoring and accountability systems are also needed to ensure that CHCs adequately serve  
16 patients.

17  
18  
19  
20  
21  
22  
23  
24  
25  
26  
27  
28  
29  
30  
31  
32  
33  
34  
35  
36  
37  
38  
39  
40  
41  
42  
43  
44  
45  
46  
47  
48  
49  
50  
51  
52  
53  
54  
55  
56  
57  
58  
59  
60  
Other research suggests that the community's delay in mobilizing can be considered a  
fourth delay that hinders timely management of emergency conditions(19). In the case of  
emergency conditions such as drowning or road traffic injuries, even if the decision to seek care  
is made quickly, the delay in mobilizing care from first responders at the scene of the illness  
episode can determine the outcome of the injury. Bystander education and awareness has been  
identified as an important factor influencing this delay and a qualitative study on trauma delays  
for road traffic injury patients in Brazil found that bystander capacity to provide care was  
low(20). Simple interventions at the community level may be highly effective to mobilize first  
responders in low-resource settings. For example, interventions have included training  
commercial drivers in providing first aid(21) and training laypeople to be first responders(22). In

our study, community members were interested in receiving training in first aid and some had already received prior training. Community-based programs have enjoyed much success in Bangladesh across a range of health conditions(23). Bangladesh started community-based programs to address drowning and these programs have shown an average DALY cost aversion of \$362(24). Approaches from these programs can be adapted to develop community-based education and training for the management of emergency conditions. In rural Bangladesh, community mobilization strategies that involve multiple approaches combining education and training, as well as enhanced community infrastructure may create enabling environments for improved outcomes from emergency medical conditions.

### **Limitations**

Due to road access and weather limitations, data were only collected from six of the nine unions in Raiganj. Additionally, participants were identified by local community leaders and their views may not be representative of all community members; however, those individuals were sampled based on specific criteria we deemed important for answering the research questions and purposive sampling is a strength of this type of research.

This study did have several strengths. First, by eliciting the voices of community members and healthcare providers, unique insights were gained that allowed for comparisons between the local and biomedical communities. Second, by including sub-groups of community members (e.g. men, women, elders, and community leaders) and as well as sub-groups of healthcare providers (e.g. doctors, nurses, community health workers), participant triangulation was achieved.

### **Conclusions**

1  
2  
3 In rural Bangladesh, the health system has a far reach through a multi-tiered network of  
4 providers. However, several socio-contextual factors influence care seeking decisions and could  
5 contribute to delays in deciding to seek care, while lack of adequate training, and manpower and  
6 resource shortages resulted in delays in receiving care at the health facility. Both these factors  
7 could contribute to adverse outcomes from emergency medical conditions. While better  
8 infrastructure and resources are necessary, improvements in emergency care delivery in this  
9 setting may be achieved through modest, yet targeted behavior change interventions, such as  
10 training of community members and healthcare providers.  
11  
12  
13  
14  
15  
16  
17  
18  
19  
20  
21  
22  
23

#### 24 **CONTRIBUTORSHIP STATEMENT**

25  
26 BS conceived the study; BS designed the study protocol; NK and SK carried out the analysis and  
27 interpretation of these data. BS, NK and SK drafted the manuscript; GY, KF, KBU, FR and JR  
28 critically revised the manuscript for intellectual content. All authors read and approved the final  
29 manuscript.  
30  
31  
32  
33  
34  
35  
36  
37

#### 38 **ACKNOWLEDGMENTS**

39  
40 None  
41  
42  
43  
44

#### 45 **FUNDING**

46  
47 This work was supported by the Paul S. Lietman Global Travel Grant from the Johns Hopkins  
48 Center for Global Health.  
49  
50  
51  
52  
53

#### 54 **COMPETING INTERESTS**

1  
2  
3 None declared  
4  
5  
6  
7

## 8 **ETHICAL APPROVAL**

9  
10 Ethical approval for this study was granted by the Johns Hopkins Medicine Institutional Review  
11 Board and the Ethical Review Committee of the Bangladesh Medical Research Council.  
12  
13  
14

## 15 **DATA AVAILABILITY STATEMENT**

16  
17 De-identified transcripts can be requested by emailing the lead author, Bansari Shah  
18  
19 (bansarishahmd@gmail.com)  
20  
21  
22  
23

## 24 **REFERENCES**

- 25  
26  
27  
28 (1) Hsia RY, Thind A, Zakariah A, et al. Prehospital and Emergency Care: Updates from the  
29 Disease Control Priorities, Version 3. *World J Surg* 2015;39(9):2161-7. doi:10.1007/s00268-  
30 015-2997-5.  
31  
32  
33 (2) Institute for Health Metrics and Evaluation (IHME). **Bangladesh profile**. Seattle, WA:  
34 IHME, University of Washington, 2018. Available: <http://www.healthdata.org/bangladesh>  
35  
36  
37 (3) Rahman A, Alonge O, Bhuiyan AA, et al. Epidemiology of Drowning in Bangladesh: An  
38 Update. *Int J Environ Res Public Health* 2017;14(5):488. doi:[10.3390/ijerph14050488](https://doi.org/10.3390/ijerph14050488)  
39  
40 (4) Global status report on road safety 2018. Geneva: World Health Organization; 2018. Licence:  
41 CC BYNC- SA 3.0 IGO. Available:  
42 [https://www.who.int/violence\\_injury\\_prevention/road\\_safety\\_status/2018/en/](https://www.who.int/violence_injury_prevention/road_safety_status/2018/en/)  
43  
44 (5) Ul Baset MK, Rahman A, Alonge O, et al. Pattern of Road Traffic Injuries in Rural  
45 Bangladesh: Burden Estimates and Risk Factors. *Int J Environ Res Public Health*  
46 2017;14(11):1354. doi:10.3390/ijerph14111354.  
47  
48 (6) Thaddeus S, Maine D. Too far to walk: maternal mortality in context. *Soc Sci Med*  
49 1994;38(8):1091-110.  
50  
51 (7) Sk MIK, Paswan B, Anand A, et al. Praying until death: revisiting three delays model to  
52 contextualize the socio-cultural factors associated with maternal deaths in a region with high  
53  
54  
55  
56  
57  
58  
59  
60

1  
2  
3 prevalence of eclampsia in India. *BMC Pregnancy Childbirth* 2019;19(1):314. doi:  
4 10.1186/s12884-019-2458-5.  
5

6  
7 (8) Mgawadere F, Unkels R, Kazembe A, et al. Factors associated with maternal mortality in  
8 Malawi: application of the three delays model. *BMC Pregnancy Childbirth* 2017;17(1):219. doi:  
9 10.1186/s12884-017-1406-5.  
10

11 (9) Pajuelo MJ, Anticona Huaynate C, Correa M, et al. Delays in seeking and receiving health  
12 care services for pneumonia in children under five in the Peruvian Amazon: a mixed-methods  
13 study on caregivers' perceptions. *BMC Health Serv Res* 2018;18(1):149. doi: 10.1186/s12913-  
14 018-2950-z.  
15

16  
17 (10) Sikder SS, Labrique AB, Craig IM, et al. Patterns and determinants of care seeking for  
18 obstetric complications in rural northwest Bangladesh: analysis from a prospective cohort study.  
19 *BMC Health Serv Res* 2015;15:166. doi: [10.1186/s12913-015-0832-1](https://doi.org/10.1186/s12913-015-0832-1)  
20

21 (11) Calvello EJ, Skog AP, Tenner AG, et al. Applying the lessons of maternal mortality  
22 reduction to global emergency health. *Bull World Health Organ* 2015;93(6):417-23.  
23 doi: [10.2471/BLT.14.146571](https://doi.org/10.2471/BLT.14.146571)  
24

25  
26 (12) Bangladesh Bureau of Statistics. Available: [http://www.citypopulation.de/php/bangladesh-  
27 admin.php?adm2id=8861](http://www.citypopulation.de/php/bangladesh-admin.php?adm2id=8861)  
28

29 (13) Lu L, Liu M, Sun R, et al. Myocardial Infarction: Symptoms and Treatments. *Cell Biochem*  
30 *Biophys* 2015;72(3):865-7. doi: 10.1007/s12013-015-0553-4.  
31

32  
33 (14) Aminde LN, Takah N, Ngwasiri C, et al. Population awareness of cardiovascular disease  
34 and its risk factors in Buea, Cameroon. *BMC Public Health* 2017;17(1):545. doi:  
35 10.1186/s12889-017-4477-3.  
36

37 (15) Hertz JT, Madut DB, Tesha RA, et al. Knowledge of myocardial infarction symptoms and  
38 perceptions of self-risk in Tanzania. *Am Heart J* 2019;210:69-74. doi: 10.1016/j.ahj.2019.01.003.  
39

40  
41 (16) Ferdous J, Mallick D. Norms, practices, and gendered vulnerabilities in the lower Teesta  
42 basin, Bangladesh. *Environ Dev* 2019;31:88-96. <https://doi.org/10.1016/j.envdev.2018.10.003>  
43

44 (17) Audet CM, Salato J, Blevins M, et al. Educational intervention increased referrals to  
45 allopathic care by traditional healers in three high HIV-prevalence rural districts in Mozambique.  
46 *PLoS One* 2013;8(8):e70326. doi: 10.1371/journal.pone.0070326.  
47

48  
49 (18) Willis-Shattuck M, Bidwell P, Thomas S, et al. Motivation and retention of health workers  
50 in developing countries: a systematic review. *BMC Health Serv Res* 2008;8:247. doi:  
51 10.1186/1472-6963-8-247.  
52  
53  
54  
55  
56  
57  
58  
59

1  
2  
3 (19) MacDonald T, Jackson S, Charles MC, et al. The fourth delay and community-driven  
4 solutions to reduce maternal mortality in rural Haiti: a community-based action research study.  
5 *BMC Pregnancy Childbirth* 2018;18(1):254. doi: 10.1186/s12884-018-1881-3.  
6

7  
8 (20) Patel A, Vissoci JRN, Hocker M, et al. Qualitative evaluation of trauma delays in road  
9 traffic injury patients in Maringa, Brazil. *BMC Health Serv Res* 2017;17(1):804. doi:  
10.1186/s12913-017-2762-6.  
11

12 (21) Mock CN, Tiska M, Adu-Ampofo M, et al. Improvements in prehospital trauma care in an  
13 African country with no formal emergency medical services. *J Trauma* 2002;53(1):90-7. doi:  
14 10.1097/00005373-200207000-00018.  
15

16 (22) Husum H, Gilbert M, Wisborg T. Training pre-hospital trauma care in low-income  
17 countries: the 'Village University' experience. *Med Teach* 2003;25(2):142-8. doi:  
18 10.1080/0142159031000092526.  
19

20 (23) El Arifeen S, Christou A, Reichenbach L, et al. Community-based approaches and  
21 partnerships: innovations in health-service delivery in Bangladesh. *Lancet* 2013;382(9909):2012-  
22 26. doi: 10.1016/S0140-6736(13)62149-2.  
23

24 (24) Rahman F, Bose S, Linnan M, et al. Cost-effectiveness of an injury and drowning  
25 prevention program in Bangladesh. *Pediatrics* 2012;130(6):e1621-8. doi: 10.1542/peds.2012-  
26 0757.  
27  
28  
29  
30

## 31 32 33 **FIGURES**

34 **Figure 1:** Structure of the public health system in Bangladesh

35  
36  
37 **Figure 2:** Continuum of care-seeking behavior as explained by community members in rural  
38 Bangladesh  
39  
40  
41  
42  
43  
44  
45  
46  
47  
48  
49  
50  
51  
52  
53  
54  
55  
56  
57  
58  
59  
60



Structure of the public health system in Bangladesh

90x67mm (300 x 300 DPI)





25 Continuum of care-seeking behavior as explained by community members in rural Bangladesh

26 90x50mm (300 x 300 DPI)

## Interview guide for Healthcare providers

### General Work

- 1) How long have you worked in this region?
- 2) Who do you treat? (questions pertaining to patient population)
  - a. What is the age range of patients you see?
  - b. What is the general socioeconomic background of your patients?
- 3) What are the most common reasons patients seek care? (questions pertaining to illness/disease diagnosed and treated)
  - a. Are you able to provide them appropriate care?
  - b. What type of interventions do you use?
- 4) When do patients come to you? (questions about timing)
  - a. When are you available?
- 5) Where do you see your patients? (questions pertaining to location)
  - a. Where do you get the supplies for your interventions?
  - b. Are the supplies always available?
  - c. Where do you refer patients to?
  - d. How far are these referral locations?

### Emergency Care

- 6) How do you deal with emergency situations?
- 7) What resources do you have for these situations?
- 8) Do community members know where to go when they have an emergency?
- 9) Do you feel patients understand when to seek help?
- 10) Are timely interventions possible?
- 11) Is timely transportation an issue?
- 12) What do you think could improve the situation?

## Focus Group guide for Community Members

- 1) Who is the first person you contact when you need urgent health care?
  - a. Who makes the decision to seek outside help?
  - b. Who do you notify?
- 2) What do you perceive as an emergency?
  - a. How do you decide?
- 3) When do you seek medical care in the day?
  - a. What about at night?
  - b. Is there a delay in time before seeking care? If so, Why?
- 4) Where do you go?
  - a. How far is this from home?
  - b. Why this location?
  - c. Is this where you go for care for your children as well?
  - d. Where do you go for medications?
  - e. What hours are these services available?
- 5) Do you receive the help you need?

|                    | Topic                                        | Item                                                                                                                                                                                                                                                                                                                                             | Page number                            |
|--------------------|----------------------------------------------|--------------------------------------------------------------------------------------------------------------------------------------------------------------------------------------------------------------------------------------------------------------------------------------------------------------------------------------------------|----------------------------------------|
| Title and abstract |                                              |                                                                                                                                                                                                                                                                                                                                                  |                                        |
| 1                  | Title                                        | Concise description of the nature and topic of the study<br>Identifying the study as qualitative or indicating the approach (e.g., ethnography, grounded theory) or data collection methods (e.g., interview, focus group) is recommended                                                                                                        | Title Page                             |
| 2                  | Abstract                                     | Summary of key elements of the study using the abstract format of the intended publication; typically includes background, purpose, methods, results, and conclusions                                                                                                                                                                            | Page 1                                 |
| Introduction       |                                              |                                                                                                                                                                                                                                                                                                                                                  |                                        |
| 3                  | Problem formulation                          | Description and significance of the problem/phenomenon studied; review of relevant theory and empirical work; problem statement                                                                                                                                                                                                                  | Pages 4-5                              |
| 4                  | Purpose of research question                 | Purpose of the study and specific objectives or questions                                                                                                                                                                                                                                                                                        | Page 5: lines 21-23                    |
| Methods            |                                              |                                                                                                                                                                                                                                                                                                                                                  |                                        |
| 5                  | Qualitative approach and research paradigm   | Qualitative approach (e.g., ethnography, grounded theory, case study, phenomenology, narrative research) and guiding theory if appropriate; identifying the research paradigm (e.g., postpositivist, constructivist/interpretivist) is also recommended; rationale                                                                               | Page 6: line: 15                       |
| 6                  | Researcher characteristics and reflexivity   | Researchers' characteristics that may influence the research, including personal attributes, qualifications/experience, relationship with participants, assumptions, and/or presuppositions; potential or actual interaction between researchers' characteristics and the research questions, approach, methods, results, and/or transferability | Page 7: lines 19-21                    |
| 7                  | Context                                      | Setting/site and salient contextual factors; rationale                                                                                                                                                                                                                                                                                           |                                        |
| 8                  | Sampling strategy                            | How and why research participants, documents, or events were selected; criteria for deciding when no further sampling was necessary (e.g., sampling saturation); rationale                                                                                                                                                                       | Page 7: lines 6, 15-19                 |
| 9                  | Ethical issues pertaining to human subjects  | Documentation of approval by an appropriate ethics review board and participant consent, or explanation for lack thereof; other confidentiality and data security issues                                                                                                                                                                         | Page 8: lines 18-20                    |
| 10                 | Data collection methods                      | Types of data collected; details of data collection procedures including (as appropriate) start and stop dates of data collection and analysis, iterative process, triangulation of sources/methods, and modification of procedures in response to evolving study findings; rationale                                                            | Page 6: lines 15-17                    |
| 11                 | Data collection instruments and technologies | Description of instruments (e.g., interview guides, questionnaires) and devices (e.g., audio recorders) used for data collection; if/how the instrument(s) changed over the course of the study                                                                                                                                                  | Page 6: lines 17-22; Page 7: lines 1-5 |
| 12                 | Units of study                               | Number and relevant characteristics of participants, documents, or events included in the study; level of                                                                                                                                                                                                                                        | Page 7: lines 8-14                     |

|                  |                                                                                              |                                                                                                                                                                                                                                                                                                       |                                        |
|------------------|----------------------------------------------------------------------------------------------|-------------------------------------------------------------------------------------------------------------------------------------------------------------------------------------------------------------------------------------------------------------------------------------------------------|----------------------------------------|
|                  |                                                                                              | participation (could be reported in results)                                                                                                                                                                                                                                                          |                                        |
| 13               | Data processing                                                                              | Methods for processing data prior to and during analysis, including transcription, data entry, data management and security, verification of data integrity, data coding, and anonymization/de-identification of excerpts                                                                             | Page 7: lines 21-22; Page 8: lines 1-2 |
| 14               | Data analysis                                                                                | Process by which inferences, themes, etc., were identified and developed, including the researchers involved in data analysis; usually references a specific paradigm or approach; rationale                                                                                                          | Page 8: lines 5-15                     |
| 15               | Techniques to enhance trustworthiness                                                        | Techniques to enhance trustworthiness and credibility of data analysis (e.g., member checking, audit trail, triangulation); rationale                                                                                                                                                                 | Page 8: lines 7-11                     |
| Results/findings |                                                                                              |                                                                                                                                                                                                                                                                                                       |                                        |
| 16               | Synthesis and interpretation                                                                 | Main findings (e.g., interpretations, inferences, and themes); might include development of a theory or model, or integration with prior research or theory                                                                                                                                           | Page 9: lines 6-8                      |
| 17               | Links to empirical data                                                                      | Evidence (e.g., quotes, field notes, text excerpts, photographs) to substantiate analytic findings                                                                                                                                                                                                    | Pages 10-16                            |
| Discussion       |                                                                                              |                                                                                                                                                                                                                                                                                                       |                                        |
| 18               | Integration with prior work, implications, transferability, and contribution(s) to the field | Short summary of main findings; explanation of how findings and conclusions connect to, support, elaborate on, or challenge conclusions of earlier scholarship; discussion of scope of application/generalizability; identification of unique contribution(s) to scholarship in a discipline or field | Pages 16-19                            |
| 19               | Limitations                                                                                  | Trustworthiness and limitations of findings                                                                                                                                                                                                                                                           | Page 19                                |
| Other            |                                                                                              |                                                                                                                                                                                                                                                                                                       |                                        |
| 20               | Conflicts of interest                                                                        | Potential sources of influence or perceived influence on study conduct and conclusions; how these were managed                                                                                                                                                                                        | Page 21: lines 1-2                     |
| 21               | Funding                                                                                      | Sources of funding and other support; role of funders in data collection, interpretation, and reporting                                                                                                                                                                                               | Page 20: lines 20-22                   |
