# Supplementary material for: Applying the Three Delays Model to understand emergency care seeking and delivery in rural Bangladesh: a qualitative study
Source: PubMed Central journal article supplement — BMJ Open. 2020 Dec 23;10(12):e042690. doi: 10.1136/bmjopen-2020-042690 (PMC7759951; doi:10.1136/bmjopen-2020-042690), 2020-12-23
Supplement: bmjopen-2020-042690supp001.pdf [file bmjopen-2020-042690supp001.pdf]

## Interview guide for Healthcare providers

### General Work

- 1) How long have you worked in this region?
- 2) Who do you treat? (questions pertaining to patient population)
  - a. What is the age range of patients you see?
  - b. What is the general socioeconomic background of your patients?
- 3) What are the most common reasons patients seek care? (questions pertaining to illness/disease diagnosed and treated)
  - a. Are you able to provide them appropriate care?
  - b. What type of interventions do you use?
- 4) When do patients come to you? (questions about timing)
  - a. When are you available?
- 5) Where do you see your patients? (questions pertaining to location)
  - a. Where do you get the supplies for your interventions?
  - b. Are the supplies always available?
  - c. Where do you refer patients to?
  - d. How far are these referral locations?

### Emergency Care

- 6) How do you deal with emergency situations?
- 7) What resources do you have for these situations?
- 8) Do community members know where to go when they have an emergency?
- 9) Do you feel patients understand when to seek help?
- 10) Are timely interventions possible?
- 11) Is timely transportation an issue?
- 12) What do you think could improve the situation?

## Focus Group guide for Community Members

- 1) Who is the first person you contact when you need urgent health care?
  - a. Who makes the decision to seek outside help?
  - b. Who do you notify?
- 2) What do you perceive as an emergency?
  - a. How do you decide?
- 3) When do you seek medical care in the day?
  - a. What about at night?
  - b. Is there a delay in time before seeking care? If so, Why?
- 4) Where do you go?
  - a. How far is this from home?
  - b. Why this location?
  - c. Is this where you go for care for your children as well?
  - d. Where do you go for medications?
  - e. What hours are these services available?
- 5) Do you receive the help you need?
